# Supplementary material for: Enhanced Cas12a multi-gene regulation using a CRISPR array separator
Source: eLife. 2021 Sep 9;10:e66406. doi: 10.7554/eLife.66406 (PMC8478413; doi:10.7554/eLife.66406)
Supplement: Figure 1—figure supplement 1—source data 1. [file elife-66406-fig1-figsupp1-data1.xlsx]

## Sheet: Sheet1
SampleName	(-)FreeEnergyOfThermodynamicEnsemble	%GFPcells
Set1-10	0.25	12.53
Set1-20	0.04	12.93
Set1-30	0.77	12.67
Set1-40	0.05	11.3
Set1-50	1.88	0
Set1-60	4.11	5.8
Set1-70	2.54	10.4
Set1-80	5.97	8.33
Set1-90	8.26	9.07
Set2-10	0.83	10.5
Set2-20	1.45	10.4
Set2-30	1.49	12.5
Set2-40	3.54	5.8
Set2-50	6.32	9.83
Set2-60	2.73	7.53
Set2-70	1.39	1.7
Set2-80	2.92	10.57
Set2-90	13.87	0.7
Set3-10	0.54	12.27
Set3-20	0.02	9.57
Set3-30	0.06	9.03
Set3-40	0.18	9.3
Set3-50	0.64	7.03
Set3-60	1.34	7.07
Set3-70	4.65	3
Set3-80	5.18	4.3
Set3-90	7.44	1.53
Set4-10	0.92	10.37
Set4-20	0.02	9.27
Set4-30	0.48	7.3
Set4-40	1.71	5.03
Set4-50	2.5	9.67
Set4-60	1.15	5.1
Set4-70	1.86	6.27
Set4-80	11.91	1.03
Set4-90	9.65	0.33
Set5-10	0.03	10.2
Set5-20	0.13	9.13
Set5-30	0.5	7.63
Set5-40	0.35	7.8
Set5-50	0.78	4.9
Set5-60	3.05	4.47
Set5-70	3.66	5.07
Set5-80	0.41	0.5
Set5-90	8.56	0.07
Set6-30	1.82	10.4333
Set6-40	0.13	8.7
Set6_50	3.15	0.2
Set6-63	2.32	1.43333
Set6-70	2.37	0.9
Set6-80	6.24	8.13333
Set7-30	3.63	8.4
