# Supplementary material for: Enhanced Cas12a multi-gene regulation using a CRISPR array separator
Source: eLife. 2021 Sep 9;10:e66406. doi: 10.7554/eLife.66406 (PMC8478413; doi:10.7554/eLife.66406)
Supplement: Figure 1—source data 1. [file elife-66406-fig1-data1.xlsx]

## Sheet: Fig.1G_S1A
SampleName	PercentGFP+	GFPIntensityOverPositiveControl
10%GC-1_replicate1	12.9	1.07812
10%GC-1_replicate2	11.3	1.33594
10%GC-1_replicate3	13.4	0.75
10%GC-2_replicate1	13.3	2.13699
10%GC-2_replicate2	7.9	2.21918
10%GC-2_replicate3	10.33	0.945205
10%GC-3_replicate1	15.4	1.875
10%GC-3_replicate2	11.22	1.125
10%GC-3_replicate3	10.2	2.01562
10%GC-4_replicate1	10.2	0.521739
10%GC-4_replicate2	9.2	0.5
10%GC-4_replicate3	11.68	0.869565
10%GC-5_replicate1	8.2	0.765306
10%GC-5_replicate2	11.4	0.673469
10%GC-5_replicate3	11	1.2551
20%GC-1_replicate1	12.9	1.05469
20%GC-1_replicate2	13.2	1.03125
20%GC-1_replicate3	12.7	0.75
20%GC-2_replicate1	10.46	1.31507
20%GC-2_replicate2	10.45	1.39726
20%GC-2_replicate3	10.21	0.986301
20%GC-3_replicate1	9.74	1.45312
20%GC-3_replicate2	9.7	0.984375
20%GC-3_replicate3	9.8	1.26562
20%GC-4_replicate1	8.46	0.630435
20%GC-4_replicate2	9.6	0.804348
20%GC-4_replicate3	9.7	0.543478
20%GC-5_replicate1	8	0.979592
20%GC-5_replicate2	9.3	0.734694
20%GC-5_replicate3	10.1	0.704082
30%GC-1_replicate1	12.6	1.05469
30%GC-1_replicate2	13.6	0.9375
30%GC-1_replicate3	11.8	1.05469
30%GC-2_replicate1	12.4	0.90411
30%GC-2_replicate2	9.94	0.616438
30%GC-2_replicate3	15.17	0.986301
30%GC-3_replicate1	10	1.45312
30%GC-3_replicate2	7.3	0.609375
30%GC-3_replicate3	9.8	1.17188
30%GC-4_replicate1	10.2	1.06522
30%GC-4_replicate2	6.04	0.608696
30%GC-4_replicate3	5.7	0.956522
30%GC-5_replicate1	8.1	0.520408
30%GC-5_replicate2	7	0.55102
30%GC-5_replicate3	7.8	0.765306
30%GC-6_replicate1	10.1	0.930035
30%GC-6_replicate2	9.5	1.12897
30%GC-6_replicate3	8.2	0.940996
40%GC-1_replicate1	11.1	0.914062
40%GC-1_replicate2	12.3	1.26562
40%GC-1_replicate3	10.5	0.84375
40%GC-2_replicate1	5.69	1.0274
40%GC-2_replicate2	4.4	1.35616
40%GC-2_replicate3	7.34	0.780822
40%GC-3_replicate1	8.2	0.890625
40%GC-3_replicate2	9.8	1.125
40%GC-3_replicate3	9.9	0.796875
40%GC-4_replicate1	8.6	0.956522
40%GC-4_replicate2	9.1	0.869565
40%GC-4_replicate3	11.3	1.71739
40%GC-5_replicate1	8.4	0.795918
40%GC-5_replicate2	7.7	0.826531
40%GC-5_replicate3	7.3	0.765306
40%GC-6_replicate1	4.6	1.21853
40%GC-6_replicate2	5.5	0.707722
40%GC-6_replicate3	4.4	0.746154
50%GC-1_replicate1	0	0
50%GC-1_replicate2	0	0
50%GC-1_replicate3	0	0
50%GC-2_replicate1	10.91	1.56164
50%GC-2_replicate2	10.18	0.863014
50%GC-2_replicate3	8.36	0.821918
50%GC-3_replicate1	6.3	1.40625
50%GC-3_replicate2	9	1.40625
50%GC-3_replicate3	5.8	2.01562
50%GC-4_replicate1	5.2	0.369565
50%GC-4_replicate2	5.8	0.608696
50%GC-4_replicate3	4.11	0.173913
50%GC-5_replicate1	5	0.336735
50%GC-5_replicate2	5.3	0.489796
50%GC-5_replicate3	4.4	0.612245
50%GC-6_replicate1	0	0
50%GC-6_replicate2	0	0
50%GC-6_replicate3	0	0
60%GC-1_replicate1	5.2	0.46875
60%GC-1_replicate2	6.5	1.03125
60%GC-1_replicate3	5.7	0.773438
60%GC-2_replicate1	6.35	0.69863
60%GC-2_replicate2	7.55	0.945205
60%GC-2_replicate3	8.58	0.821918
60%GC-3_replicate1	7.8	1.45312
60%GC-3_replicate2	6.3	2.34375
60%GC-3_replicate3	7.1	1.5
60%GC-4_replicate1	2.97	1.21739
60%GC-4_replicate2	3.97	0.5
60%GC-4_replicate3	8.27	0.304348
60%GC-5_replicate1	3.4	0.795918
60%GC-5_replicate2	4.7	0.55102
60%GC-5_replicate3	5.3	0.397959
60%GC-6_replicate1	2	1.00676
60%GC-6_replicate2	1.9	1.10597
60%GC-6_replicate3	1.8	1.03983
70%GC-1_replicate1	10.2	0.773438
70%GC-1_replicate2	11.5	0.515625
70%GC-1_replicate3	9.5	0.609375
70%GC-2_replicate1	1.2	0.863014
70%GC-2_replicate2	1.78	0.369863
70%GC-2_replicate3	2.14	1.15068
70%GC-3_replicate1	3.2	0.65625
70%GC-3_replicate2	2.4	0.796875
70%GC-3_replicate3	3.4	0.890625
70%GC-4_replicate1	5.56	0.913043
70%GC-4_replicate2	4.86	2.28261
70%GC-4_replicate3	8.31	0.608696
70%GC-5_replicate1	6	0.520408
70%GC-5_replicate2	3.9	0.612245
70%GC-5_replicate3	5.3	0.734694
70%GC-6_replicate1	0.9	0.640455
70%GC-6_replicate2	0.9	0.703583
70%GC-6_replicate3	1	0.897813
80%GC-1_replicate1	8.4	0.726562
80%GC-1_replicate2	7.8	0.75
80%GC-1_replicate3	8.8	0.679688
80%GC-2_replicate1	8.64	1.93151
80%GC-2_replicate2	12.28	0.821918
80%GC-2_replicate3	10.77	1.10959
80%GC-3_replicate1	3.9	0.65625
80%GC-3_replicate2	4.5	0.421875
80%GC-3_replicate3	4.3	0.890625
80%GC-4_replicate1	0.71	0.152174
80%GC-4_replicate2	0.67	0.521739
80%GC-4_replicate3	1.73	0.521739
80%GC-5_replicate1	0.3	0.153061
80%GC-5_replicate2	0.3	1.22449
80%GC-5_replicate3	0.9	0.0918367
80%GC-6_replicate1	5.6	0.859098
80%GC-6_replicate2	4.5	0.703583
80%GC-6_replicate3	5.2	1.03983
90%GC-1_replicate1	7.8	0.726562
90%GC-1_replicate2	8.9	0.914062
90%GC-1_replicate3	10.5	1.47656
90%GC-2_replicate1	0.54	0.493151
90%GC-2_replicate2	0.57	1.43836
90%GC-2_replicate3	0.87	1.10959
90%GC-3_replicate1	1.7	1.5
90%GC-3_replicate2	1.6	0.84375
90%GC-3_replicate3	1.3	0.703125
90%GC-4_replicate1	0.36	0.0869565
90%GC-4_replicate2	0.26	0.0652174
90%GC-4_replicate3	0.26	0.0869565
90%GC-5_replicate1	0	0
90%GC-5_replicate2	0	0
90%GC-5_replicate3	0.2	0.0918367
