# Supplementary material for: Enhanced Cas12a multi-gene regulation using a CRISPR array separator
Source: eLife. 2021 Sep 9;10:e66406. doi: 10.7554/eLife.66406 (PMC8478413; doi:10.7554/eLife.66406)
Supplement: Figure 1—source data 2. [file elife-66406-fig1-data2.xlsx]

## Sheet: Sheet1
SampleName	DummySpacerGCcontent	(-)FreeEnergyOfThermodynamicEnsemble
Set1-10	10	10.03
Set1-20	20	9.6
Set1-30	30	10.83
Set1-40	40	10.43
Set1-50	50	16.31
Set1-60	60	14.11
Set1-70	70	13.03
Set1-80	80	18.04
Set1-90	90	18.66
Set2-10	10	11.07
Set2-20	20	10.89
Set2-30	30	11.19
Set2-40	40	13.42
Set2-50	50	16.6
Set2-60	60	14.93
Set2-70	70	15.54
Set2-80	80	13.04
Set2-90	90	24.65
Set3-10	10	10.01
Set3-20	20	9.49
Set3-30	30	13.51
Set3-40	40	11.2
Set3-50	50	14.99
Set3-60	60	10.88
Set3-70	70	17.11
Set3-80	80	15.81
Set3-90	90	20.05
Set4-10	10	10.83
Set4-20	20	10.44
Set4-30	30	10.52
Set4-40	40	11.27
Set4-50	50	12.07
Set4-60	60	11.27
Set4-70	70	11.46
Set4-80	80	21.32
Set4-90	90	23.4
Set5-10	10	10
Set5-20	20	11.59
Set5-30	30	10.53
Set5-40	40	12.25
Set5-50	50	16.12
Set5-60	60	12.84
Set5-70	70	14.46
Set5-80	80	20.41
Set5-90	90	19.98
Set6-30	30	11.38
Set6-40	40	10.27
Set6_50	50	19.56
Set6-65	65	16.02
Set6-70	70	15.11
Set6-80	80	16.99
Set7-30	30	13.24
