# Supplementary material for: Enhanced Cas12a multi-gene regulation using a CRISPR array separator
Source: eLife. 2021 Sep 9;10:e66406. doi: 10.7554/eLife.66406 (PMC8478413; doi:10.7554/eLife.66406)
Supplement: Figure 1—source data 3. [file elife-66406-fig1-data3.xlsx]

## Sheet: Sheet1
SampleName	(-)FreeEnergyOfThermodynamicEnsemble	%GFPcells
Set1-10	10.03	12.53
Set1-20	9.6	12.93
Set1-30	10.83	12.67
Set1-40	10.43	11.3
Set1-50	16.31	0
Set1-60	14.11	5.8
Set1-70	13.03	10.4
Set1-80	18.04	8.33
Set1-90	18.66	9.07
Set2-10	11.07	10.5
Set2-20	10.89	10.4
Set2-30	11.19	12.5
Set2-40	13.42	5.8
Set2-50	16.6	9.83
Set2-60	14.93	7.53
Set2-70	15.54	1.7
Set2-80	13.04	10.57
Set2-90	24.65	0.7
Set3-10	10.01	12.27
Set3-20	9.49	9.57
Set3-30	13.51	9.03
Set3-40	11.2	9.3
Set3-50	14.99	7.03
Set3-60	10.88	7.07
Set3-70	17.11	3
Set3-80	15.81	4.3
Set3-90	20.05	1.53
Set4-10	10.83	10.37
Set4-20	10.44	9.27
Set4-30	10.52	7.3
Set4-40	11.27	5.03
Set4-50	12.07	9.67
Set4-60	11.27	5.1
Set4-70	11.46	6.27
Set4-80	21.32	1.03
Set4-90	23.4	0.33
Set5-10	10	10.2
Set5-20	11.59	9.13
Set5-30	10.53	7.63
Set5-40	12.25	7.8
Set5-50	16.12	4.9
Set5-60	12.84	4.47
Set5-70	14.46	5.07
Set5-80	20.41	0.5
Set5-90	19.98	0.07
Set6-30	11.38	10.4333
Set6-40	10.27	8.7
Set6_50	19.56	0.2
Set6-63	16.02	1.43333
Set6-70	15.11	0.9
Set6-80	16.99	8.13333
Set7-30	13.24	8.4
