# Supplementary material for: Enhanced Cas12a multi-gene regulation using a CRISPR array separator
Source: eLife. 2021 Sep 9;10:e66406. doi: 10.7554/eLife.66406 (PMC8478413; doi:10.7554/eLife.66406)
Supplement: Figure 3—source data 1. [file elife-66406-fig3-data1.xlsx]

## Sheet: Sheet1
Readout=PercentGFP+
NonsenseSpacer	ArtificialSeparator=G			ArtificialSeparator=T			ArtificialSeparator=AT			ArtificialSeparator=AAT			ArtificialSeparator=AAAT
30%_GC	8.2	8.8	8.2	12.7	13.9	14.4	16.8	15	16.3	22.4	18.9	17.7	21.9	20.3	18.4
50%_GC	0.2	0	0	7.5	5.8	6.3	8	7.4	7.5	15	16.1	14.9	19.6	20.5	18.4
70%_GC	0.8	0.3	1	11.5	10.9	13.2	13.3	14.8	14.6	12.8	12.6	14.4	14	15.9	14.2
