# Supplementary material for: Enhanced Cas12a multi-gene regulation using a CRISPR array separator
Source: eLife. 2021 Sep 9;10:e66406. doi: 10.7554/eLife.66406 (PMC8478413; doi:10.7554/eLife.66406)
Supplement: Figure 3—source data 2. [file elife-66406-fig3-data2.xlsx]

## Sheet: Sheet1
Variant1	Variant2	Variant3	Variant4
0	10	0	17
0	11	0	16
0	10	0	18
0	9	0	12
	9	0
	9	0
