# Supplementary material for: Enhanced Cas12a multi-gene regulation using a CRISPR array separator
Source: eLife. 2021 Sep 9;10:e66406. doi: 10.7554/eLife.66406 (PMC8478413; doi:10.7554/eLife.66406)
Supplement: Figure 4—source data 1. [file elife-66406-fig4-data1.xlsx]

## Sheet: Sheet1
Sample	ProcessingTime	Replicate	FractionFullyProcessedGRNA
70%GC_WithoutAAAT	5min	1	0
70%GC_WithoutAAAT	5min	2	0
70%GC_WithoutAAAT	5min	3	0
70%GC_WithAAAT	5min	1	0
70%GC_WithAAAT	5min	2	0
70%GC_WithAAAT	5min	3	0
70%GC_WithoutAAAT	10min	1	0.024692
70%GC_WithoutAAAT	10min	2	0.00722961
70%GC_WithoutAAAT	10min	3	0.0236349
70%GC_WithAAAT	10min	1	0.0568873
70%GC_WithAAAT	10min	2	0.0613984
70%GC_WithAAAT	10min	3	0.0511628
70%GC_WithoutAAAT	30min	1	0.0430293
70%GC_WithoutAAAT	30min	2	0.0624376
70%GC_WithoutAAAT	30min	3	0.0287246
70%GC_WithAAAT	30min	1	0.312465
70%GC_WithAAAT	30min	2	0.207727
70%GC_WithAAAT	30min	3	0.284813
70%GC_WithoutAAAT	60min	1	0.143431
70%GC_WithoutAAAT	60min	2	0.266525
70%GC_WithoutAAAT	60min	3	0.136154
70%GC_WithAAAT	60min	1	0.356357
70%GC_WithAAAT	60min	2	0.347809
70%GC_WithAAAT	60min	3	0.447704
30%GC_WithoutAAAT	60min	1	0.473173
30%GC_WithoutAAAT	60min	2	0.397296
30%GC_WithoutAAAT	60min	3	0.54728
30%GC_WithoutAAAT	60min	4	0.604839
30%GC_WithoutAAAT	60min	5	0.619265
