# Supplementary material for: Enhanced Cas12a multi-gene regulation using a CRISPR array separator
Source: eLife. 2021 Sep 9;10:e66406. doi: 10.7554/eLife.66406 (PMC8478413; doi:10.7554/eLife.66406)
Supplement: Figure 5—source data 1. [file elife-66406-fig5-data1.xlsx]

## Sheet: Sheet1
TargetGene	RelativeRNA_Mock_replicate1	RelativeRNA_Mock_replicate2	RelativeRNA_NoSeparator_replicate1	RelativeRNA_NoSeparator_replicate2	RelativeRNA_AAAT_Separator_replicate1	RelativeRNA_AAAT_Separator_replicate2
CD9	0.00189139	0.00172072	0.026856	0.0252203	0.0532401	0.0520649
IFNG	4.1858e-06	3.0377e-06	0.00631455	0.00630607	0.00735978	0.00714068
EGFR	0.00030031	0.00053027	0.00056642	0.00046646	0.00115926	0.00085874
TMEM107	0.0003052	0.00028326	0.00189756	0.00155939	0.00264212	0.00231597
IMPACT	0.00097856	0.00113417	0.00260323	0.00203062	0.00389327	0.00350747
DANCR	0.00894848	0.00962648	0.0311123	0.030111	0.0442552	0.0354268
GFP	0.00027107	0.00031204	0.00302309	0.0040649	0.0274058	0.0296344
