# Supplementary material for: Enhanced Cas12a multi-gene regulation using a CRISPR array separator
Source: eLife journal article supplement (doi:10.7554/elife.66406), 2021-09-09

Figure 2-figure supplement 1

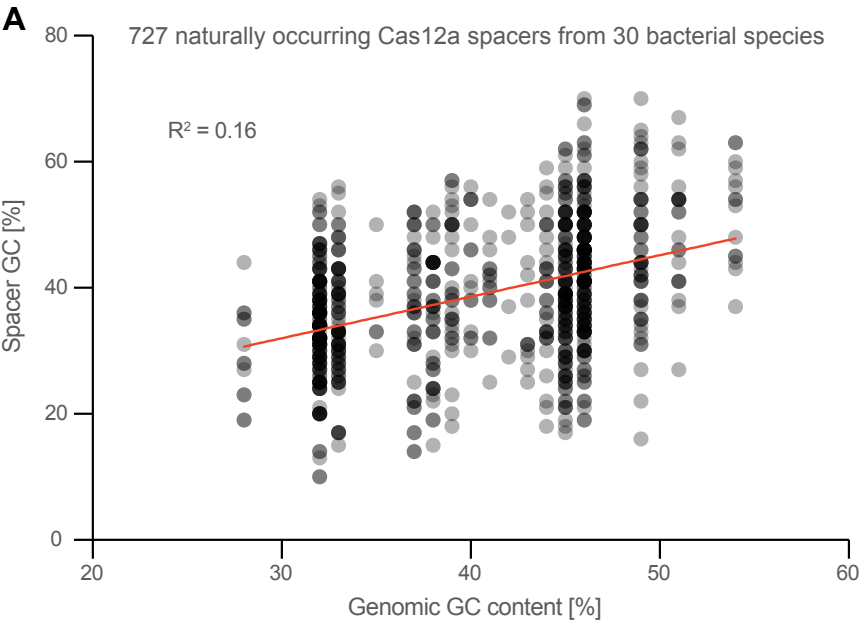

**B** 79 separators from 30 bacterial species

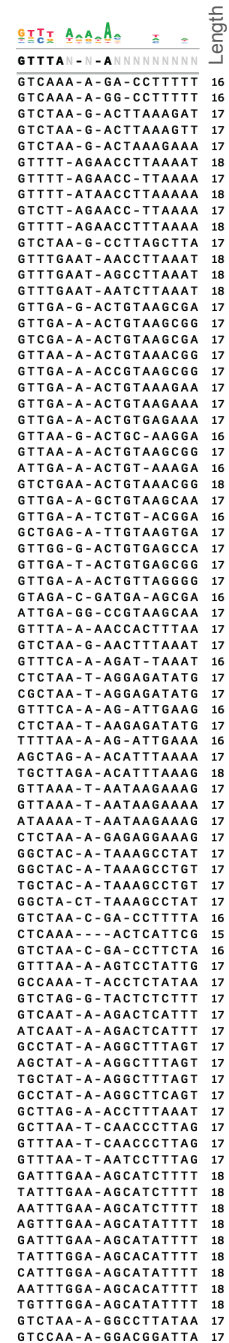

**C** Cas13d separators from 9 bacterial species

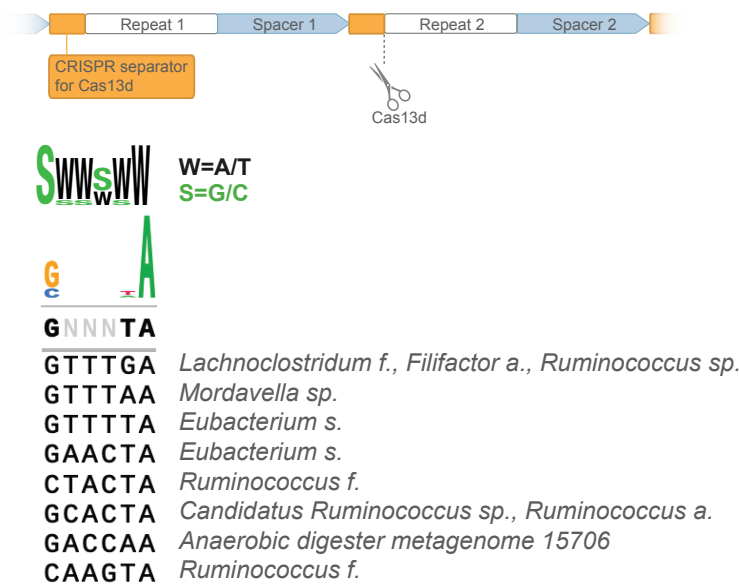

Supplement: supp [file elife-66406-supp-v1.zip]
