# Supplementary material for: Enhanced Cas12a multi-gene regulation using a CRISPR array separator
Source: eLife. 2021 Sep 9;10:e66406. doi: 10.7554/eLife.66406 (PMC8478413; doi:10.7554/eLife.66406)
Supplement: Supplementary file 2. [file elife-66406-supp2.xlsx]

## Sheet: Cas12aSpacers(Fig.2)
Species	Spacer	GCcontent	SpacerLength
Acidaminococcus_species_NZ_AWUR01000016	ATTAGGGTTGGCTGCGTTTCCTCCGT	0.538462	26
Acidaminococcus_species_NZ_AWUR01000016	GTCTAAACTGGTCGAAATCGACCAGT	0.461538	26
Acidaminococcus_species_NZ_AWUR01000016	ATACCTTTTGGTAGTATTATCAGAAA	0.269231	26
Acidaminococcus_species_NZ_AWUR01000016	TAGATGGCTTGTTTGACAGCCTCAACC	0.481481	27
Acidaminococcus_species_NZ_AWUR01000016	GCGCCTTCCAGCAGCGTCAACCCTGCA	0.666667	27
Acidaminococcus_species_NZ_AWUR01000016	ATAGATTGCCATAAGATATCCCCCTT	0.384615	26
Acidaminococcus_species_NZ_AWUR01000016	TTCTTTGGCGAAGCAACCGCCGATTG	0.538462	26
Acidaminococcus_species_NZ_AWUR01000016	TAAAACCCATGGTATATAGCGCTTGAG	0.407407	27
Acidaminococcus_species_NZ_AWUR01000016	GCAATTTTTTGGCCCTTATTGATAGGG	0.407407	27
Acidaminococcus_species_NZ_AWUR01000016	AGCGAGTCGAGCCGCTTCTCGCTTGGT	0.62963	27
Acidaminococcus_species_NZ_AWUR01000016	TTAACCTGCGTGCCTTTGCGGATGCA	0.538462	26
Acidaminococcus_species_NZ_AWUR01000016	TTATCAAGGATGTCGAACGTTCCATGT	0.407407	27
Acidaminococcus_species_NZ_AWUR01000016	ACACGGAAGGTGATTGAAAATCAACAA	0.37037	27
Acidaminococcus_species_NZ_AWUR01000016	TGACGAGAAAACGGTTTGTGCGGGTGG	0.555556	27
Acidaminococcus_species_NZ_AWUR01000016	AAATGATGTGGAGTGGAAGCCCGTCGA	0.518519	27
Acidaminococcus_species_NZ_AWUR01000016	TTGACAACAAATGGGCGCCGTCTGTTC	0.518519	27
Acidaminococcus_species_NZ_AWUR01000016	CAATGGGCGGAGACCCAGCATCCATTCGG	0.62069	29
Acidaminococcus_species_NZ_AWUR01000016	ATCGCCGTTCCAAGTCTTCCAGTCGA	0.538462	26
Acidaminococcus_species_NZ_AWUR01000016	TTTTTGGGAACGTCGATGTCAACGAAG	0.444444	27
Acidaminococcus_species_NZ_AWUR01000016	ATGTAAGCGAAGGCGTTCCGGTTCAG	0.538462	26
Acidaminococcus_species_NZ_AWUR01000016	GAAAGTGCGGAGTCATAATCCTTTGGGT	0.464286	28
Butyrivibrio_proteoclasticus_CP001812	CGTCGCAGAAAGGAGATGAGATCGCAATGA	0.5	30
Butyrivibrio_proteoclasticus_CP001812	ATTCCAGGCGACCCATTCTTGGTCGGAAGC	0.566667	30
Butyrivibrio_proteoclasticus_CP001812	GTACGTTTCTCCTTTCAATTGTTGTT	0.346154	26
Butyrivibrio_proteoclasticus_CP001812	TGTGGCAAGTTGATTAGCCATTCAAGGACT	0.433333	30
Butyrivibrio_proteoclasticus_CP001812	AGGTGCTTGACATCTGGCATTCTTTTTTGT	0.4	30
Butyrivibrio_proteoclasticus_CP001812	GCGATTCGTGAGGATTACCAAATGCATGGC	0.5	30
Butyrovibrio_hungatei_CP017832	CCGCTTCTTGTGTATGCTTCAATCACTT	0.428571	28
Butyrovibrio_hungatei_CP017832	GATATTGTGGTGACTTTGCAGGAATGA	0.407407	27
Butyrovibrio_hungatei_CP017832	ATAGAATTTAAGGGTGTCAATTTTTTTT	0.214286	28
Butyrovibrio_hungatei_CP017832	GTGTTTCACCTCCCTTCCATATGGTT	0.461538	26
Butyrovibrio_hungatei_CP017832	AGCAATCGCTTAATGGTCGCATGGGTC	0.518519	27
Butyrovibrio_hungatei_CP017832	TTATATCGGGGCGATATGAATTCAGTAA	0.357143	28
Butyrovibrio_hungatei_CP017832	ATGTACCTATGTATAAACCTGGTGAAA	0.333333	27
Butyrovibrio_hungatei_CP017832	TTGAGCTTGTCTTGCAATCGGTAGAATA	0.392857	28
Butyrovibrio_hungatei_CP017832	AATATATTAATAAGTGTCGAGTTATAG	0.222222	27
Butyrovibrio_hungatei_CP017832	GGTGATTATGGGCTTGACTACGACACA	0.481481	27
Butyrovibrio_hungatei_CP017832	TCTCTTTTCTAGGGGGAAACTTTGCTGTC	0.448276	29
Butyrovibrio_hungatei_CP017832	ATTGATTTCATCAAAAGCTTAGCTAAAA	0.25	28
Butyrovibrio_hungatei_CP017832	CTTACGCAAGGCTTCGTTGTAAGGTG	0.5	26
Butyrovibrio_hungatei_CP017832	TTTCCGTCTTTGCCATAATCGCAAATGG	0.428571	28
Butyrovibrio_hungatei_CP017832	TTAGGTACTTGCTATATCTATGCACTC	0.37037	27
Butyrovibrio_hungatei_CP017832	CTGTGCGTTTGCTTATAGAGATCACC	0.461538	26
Butyrovibrio_hungatei_CP017832	CGGAGTTGAAGGTACAAAGACATCAGA	0.444444	27
Butyrovibrio_hungatei_CP017832	ATATTACATAGCGAAAACAGCGATAA	0.307692	26
Butyrovibrio_hungatei_CP017832	ACCGTTGATTGTTTCAATCATTATGTAG	0.321429	28
Butyrovibrio_hungatei_CP017832	AAGGTGTTATTACACTTATGTTTAAAA	0.222222	27
Butyrovibrio_hungatei_CP017832	CAATAATTATCAGATTGATAATGATTTTT	0.172414	29
Butyrovibrio_hungatei_CP017832	GGATAATCGCTCCGGGGAAGAATGGTT	0.518519	27
Butyrovibrio_hungatei_CP017832	TTATGTAGTAAAAATCAGTTTTAAATAT	0.142857	28
Butyrovibrio_hungatei_CP017832	TCATTTCGCTCGGCGTGAATCCTTGGTT	0.5	28
Butyrovibrio_hungatei_CP017832	GTGCTGTGAGTTTTTACTTTTTTCATACA	0.310345	29
Butyrovibrio_hungatei_CP017832	TCACTTGTCGCTTTTGTTCTTTGAA	0.36	25
Butyrovibrio_hungatei_CP017832	CAGGATAGAACCTTCCAGCTTCCTTAAG	0.464286	28
Butyrovibrio_hungatei_CP017832	TAGTGTAATCCCATTGTTTAGCCAAAT	0.333333	27
Butyrovibrio_hungatei_CP017832	AAGTACTAAATCTTGGTTAACAAGGTGC	0.357143	28
Butyrovibrio_hungatei_CP017832	AAACAAAGTACGCTCTTGGCCGTATAA	0.407407	27
Butyrovibrio_hungatei_CP017832	TCGAGGCATGTAACATATACAAGTATG	0.37037	27
Butyrovibrio_hungatei_CP017832	AAGGGTTTCTAGTGTAAATACAGCGTGA	0.392857	28
Butyrovibrio_hungatei_CP017832	TGGACTGGGATAACAATGCAAATAAG	0.384615	26
Butyrovibrio_hungatei_CP017832	TTAATTGTGACCTTGCTAATGTCAAA	0.307692	26
Butyrovibrio_hungatei_CP017832	TCTATATTTTTGCACTTCCATATCCGG	0.37037	27
Butyrovibrio_hungatei_CP017832	ATCGGCTTCTGCCTGCTGTATACCTACT	0.5	28
Candidatus_Methanoplasma_termitum_CP010070.1_5	AGGCGCAGGACCTGGGCTGTAATCC	0.64	25
Candidatus_Methanoplasma_termitum_CP010070.1_5	AAATTGTTCAAAAGGATCTTATGAAG	0.269231	26
Candidatus_Methanoplasma_termitum_CP010070.1_5	TCCATCATTGCGGTATAATAGATACT	0.346154	26
Candidatus_Methanoplasma_termitum_CP010070.1_5	AATTTAGAGATAATAAGAAAAAACT	0.16	25
Candidatus_Methanoplasma_termitum_CP010070.1_5	GTGACCTGTGCACCAGGACTCATGG	0.6	25
Candidatus_Methanoplasma_termitum_CP010070.1_5	GTGTTAGCAATATCTATCACCTGTAGG	0.407407	27
Candidatus_Methanoplasma_termitum_CP010070.1_5	ATAAGGTTGAAACTATAAATTCTGAAA	0.222222	27
Candidatus_Methanoplasma_termitum_CP010070.1_5	AAACCTAACCAGCCGATACTCAGGCG	0.538462	26
Candidatus_Methanoplasma_termitum_CP010070.1_5	GTACACTCAGGGTGTCTGGCTCTACT	0.538462	26
Candidatus_Methanoplasma_termitum_CP010070.1_5	AGCTGAAACCTGATTAGTAACGGCCGT	0.481481	27
Candidatus_Methanoplasma_termitum_CP010070.1_5	GGATTGATAAAAGTTGTATCTATTGG	0.307692	26
Candidatus_Methanoplasma_termitum_CP010070.1_5	GTCTTAGGTGATAAAATGAACAACGA	0.346154	26
Candidatus_Methanoplasma_termitum_CP010070.1_5	GGCTGATAACCCTGAATGCGATGAGAGA	0.5	28
Candidatus_Methanoplasma_termitum_CP010070.1_5	AAGAGTTGAATCCCGACCTGAAGGTC	0.5	26
Candidatus_Methanoplasma_termitum_CP010070.1_5	ACTGAGATTGCGCCTGCGCCGTGGAT	0.615385	26
Candidatus_Methanoplasma_termitum_CP010070.1_5	GCCCACAGTTTTACAAGTCCGATAT	0.44	25
Candidatus_Methanoplasma_termitum_CP010070.1_5	GACAAATTAAACAACATGAAAGAGCAG	0.333333	27
Candidatus_Methanoplasma_termitum_CP010070.1_5	TAAATGCGCCATGCGTCCCCGCTGGA	0.615385	26
Candidatus_Methanoplasma_termitum_CP010070.1_5	AACACGGCGTTGATTGCGTCCGCGTCC	0.62963	27
Candidatus_Methanoplasma_termitum_CP010070.1_5	GGCACAGTTATGGATAATAACCTTCCG	0.444444	27
Candidatus_Methanoplasma_termitum_CP010070.1_5	GTACTGCACACCCGACAGCGTGGTAC	0.615385	26
Candidatus_Methanoplasma_termitum_CP010070.1_5	AATGCAGTTAAGCTATTAGCTTAACT	0.307692	26
Candidatus_Methanoplasma_termitum_CP010070.1_5	GAGGGATGGACTACTTGCCCAGACGTAA	0.535714	28
Candidatus_Methanoplasma_termitum_CP010070.1_5	GTAATGTGTCAAGCACATACTATGCGT	0.407407	27
Candidatus_Methanoplasma_termitum_CP010070.1_5	TAGATATACTCGAAGTCTCGAACATG	0.384615	26
Candidatus_Methanoplasma_termitum_CP010070.1_5	AGATCAACTTCGATCATCCGAGGAT	0.44	25
Candidatus_Methanoplasma_termitum_CP010070.1_5	AACGGAGAACGAAAGATCCTGTCCTCC	0.518519	27
Candidatus_Methanoplasma_termitum_CP010070.1_5	TAACATAACCTTCGCTTCCTGTATCGA	0.407407	27
Candidatus_Methanoplasma_termitum_CP010070.1_5	ACGTTCACTAATCTCACTGGCTGTAAG	0.444444	27
Candidatus_Methanoplasma_termitum_CP010070.1_5	TTTGTGAACGAAATAACTGCCACATC	0.384615	26
Candidatus_Methanoplasma_termitum_CP010070.1_5	GTATGAGAACCTTGTGATTGGGGTAT	0.423077	26
Candidatus_Methanoplasma_termitum_CP010070.1_5	TCGGAGCTCCAGGGCGGAATGTGCGCG	0.703704	27
Candidatus_Methanoplasma_termitum_CP010070.1_5	TATACGGTATCGGATAACGCAGGAT	0.44	25
Candidatus_Methanoplasma_termitum_CP010070.1_5	AGTGCGCCCTCAAGTACGGAAAATAG	0.5	26
Candidatus_Methanoplasma_termitum_CP010070.1_5	AAGTAGTCAAGGACTTTTGTAACGGC	0.423077	26
Candidatus_Methanoplasma_termitum_CP010070.1_5	TCTCAAGATACTGGTTCTGATCGCAG	0.461538	26
Candidatus_Methanoplasma_termitum_CP010070.1_5	AGTATCGCCGAGTAGTCCCAATTCAAC	0.481481	27
Candidatus_Methanoplasma_termitum_CP010070.1_5	AAATACACACCAACAGAGTTTTAAC	0.32	25
Candidatus_Methanoplasma_termitum_CP010070.1_5	TAATAAGAAGGAACGCCTAAGTTGGAA	0.37037	27
Candidatus_Methanoplasma_termitum_CP010070.1_5	TAACAGCAACCAAGGCCATCACAGTATA	0.428571	28
Candidatus_Methanoplasma_termitum_CP010070.1_5	TCAGGTAATGTTCCTTCTCAGACAGT	0.423077	26
Candidatus_Methanoplasma_termitum_CP010070.1_5	GACGCCATTCTCGGTGCGTATCGACT	0.576923	26
Candidatus_Methanoplasma_termitum_CP010070.1_5	CAAGATACACACCCGGTGTGTAAGGAG	0.518519	27
Candidatus_Methanoplasma_termitum_CP010070.1_5	TGTAAGAAAAGGGGGTGGTTCGGTGCTG	0.535714	28
Candidatus_Methanoplasma_termitum_CP010070.1_5	CTCACTCAGCTAACGAACCTCACAGA	0.5	26
Candidatus_Methanoplasma_termitum_CP010070.1_5	CACAACAGATCGGCCTTGATGCATGGG	0.555556	27
Candidatus_Methanoplasma_termitum_CP010070.1_5	AACACGTCCATAATCTTAACCAGATA	0.346154	26
Candidatus_Methanoplasma_termitum_CP010070.1_5	CTCAAAACTCATTCGAATCTCTACTCTTTGTAGAT	0.342857	35
Candidatus_Methanoplasma_termitum_CP010070.1_5	GTCATGGATACGAGGCTTGATTGTGC	0.5	26
Candidatus_Methanoplasma_termitum_CP010070.1_5	AAATTCGGTGATGGACAGGGCACGGCG	0.592593	27
Candidatus_Methanoplasma_termitum_CP010070.1_5	AGTTATCATTTCGCGCTCAAACTCTT	0.384615	26
Candidatus_Methanoplasma_termitum_CP010070.1_5	AATATATATACGCGCGAGCAACTGGC	0.461538	26
Candidatus_Methanoplasma_termitum_CP010070.1_5	GGCAGCAATCCGCGGATGAGCCCAAG	0.653846	26
Candidatus_Peregrinibacteria_bacterium_LBOO01000015	GAACTAAAGAAAACCGATGTCAAGAGTT	0.357143	28
Candidatus_Peregrinibacteria_bacterium_LBOO01000015	TTCCGTCACGTTTATCAAAAATTTTGT	0.296296	27
Candidatus_Peregrinibacteria_bacterium_LBOO01000015	TAGCGAAGACCAGAAACTGGCTAGAATA	0.428571	28
Candidatus_Peregrinibacteria_bacterium_LBOO01000015	ACATCCCAAAAATCCCTAACTTTTAAAT	0.285714	28
Candidatus_Peregrinibacteria_bacterium_LBOO01000015	AGTTCAGAAATCTCCGTTGCTGTCTGTT	0.428571	28
Candidatus_Peregrinibacteria_bacterium_LBOO01000015	ATATCGCCTCAATATACTTATAGTG	0.32	25
Candidatus_Peregrinibacteria_bacterium_LBOO01000015	TTTGTGTCTGTAACGATTATTCCTTTT	0.296296	27
Candidatus_Peregrinibacteria_bacterium_LBOO01000015	CATTCGATCGGGACACGAATGGAAGA	0.5	26
Candidatus_Peregrinibacteria_bacterium_LBOO01000015	AGAGCGGATGCTATCTCCAATACTCA	0.461538	26
Candidatus_Peregrinibacteria_bacterium_LBOO01000015	TATTTCCGTCACTATCGGTCGGTCGAAT	0.464286	28
Candidatus_Peregrinibacteria_bacterium_LBOO01000015	ACCTATTATGGAAGGGCAGGGACAACAAGGC	0.516129	31
Candidatus_Peregrinibacteria_bacterium_LBOO01000015	AAAAAACATGCTGATAAATGGGTTA	0.28	25
Candidatus_Peregrinibacteria_bacterium_LBOO01000015	ACCATGTACTCATCAATATATTCTTGAA	0.285714	28
Catenovulum_species_CP026604	AGTTGTAAGGTTCATACCTTTTTTAAAT	0.25	28
Catenovulum_species_CP026604	ATATATCGGCCAATTTTGAATTATTGGC	0.321429	28
Catenovulum_species_CP026604	ATGATTGTATGGCAATGGTAGTCGCA	0.423077	26
Catenovulum_species_CP026604	GTTCTTCAGCATGATATTCGTGCCTTTC	0.428571	28
Catenovulum_species_CP026604	ATCGTTGTCCCGTCTGCATATTTTGATACA	0.4	30
Catenovulum_species_CP026604	CGGTACTTAAGTCGACCCTTAAGCAA	0.461538	26
Catenovulum_species_CP026604	TTATTTAGCCCATGTTTGCTTTTGCG	0.384615	26
Catenovulum_species_CP026604	TTCGCCACCGGCTTATATCGGTGACT	0.538462	26
Catenovulum_species_CP026604	TTAAATGTGTTGTCATAGAGCAATGTTG	0.321429	28
Catenovulum_species_CP026604	TGTATGTGATTGATCAGGTTGACCCGAAA	0.413793	29
Catenovulum_species_CP026604	ACTACAAGCTTAGCATTGGCGATAGCAA	0.428571	28
Catenovulum_species_CP026604	AGCAATTAATACTGTCAGACAGACCAAAC	0.37931	29
Catenovulum_species_CP026604	GAAAGTCACCAGCAAACCTGTGATACC	0.481481	27
Catenovulum_species_CP026604	GTATGCCTCTAGCTTAGGATTAGAT	0.4	25
Catenovulum_species_CP026604	ATCAAACGTCAGGTGTTTACATAGGG	0.423077	26
Eubacterium_eligens_CP001104.1_2	TTATCTGTGCTAGGAAATGCCATATCC	0.407407	27
Eubacterium_eligens_CP001104.1_2	ATGGCAGAAGATACGGCCAGAGCAAT	0.5	26
Eubacterium_eligens_CP001104.1_2	TAACACATATTGTATTGATCATGGAA	0.269231	26
Eubacterium_eligens_CP001104.1_2	AAATTATAAAGTAACAACACAAGTAAA	0.185185	27
Eubacterium_eligens_CP001104.1_2	ATAAACCAATGAGAAAATTACTTGGATAT	0.241379	29
Eubacterium_eligens_CP001104.1_2	CTGTAGCAAGGGCAGTAACCAATTACT	0.444444	27
Eubacterium_eligens_CP001104.1_2	ACAACTATTATATAATTATCGGGTG	0.28	25
Eubacterium_eligens_CP001104.1_2	TGAGCCAGTACCAGACACTAAGTATCA	0.444444	27
Eubacterium_eligens_NC_012778	TGATACTTAGTGTCTGGTACTGGCTCA	0.444444	27
Eubacterium_eligens_NC_012778	CACCCGATAATTATATAATAGTTGT	0.28	25
Eubacterium_eligens_NC_012778	AGTAATTGGTTACTGCCCTTGCTACAG	0.444444	27
Eubacterium_eligens_NC_012778	ATATCCAAGTAATTTTCTCATTGGTTTAT	0.241379	29
Eubacterium_eligens_NC_012778	TTTACTTGTGTTGTTACTTTATAATTT	0.185185	27
Eubacterium_eligens_NC_012778	TTCCATGATCAATACAATATGTGTTA	0.269231	26
Eubacterium_eligens_NC_012778	ATTGCTCTGGCCGTATCTTCTGCCAT	0.5	26
Eubacterium_eligens_NC_012778	GGATATGGCATTTCCTAGCACAGATAA	0.407407	27
Eubacterium_rectale_FP929043	TTCCATATCAAAATCACAGTAATAAT	0.230769	26
Eubacterium_rectale_FP929043	CATGCGTTAACACACATATCAATTACG	0.37037	27
Eubacterium_rectale_FP929043	CTGCAATGGGTGAAAAAACATCCTCTA	0.407407	27
Eubacterium_rectale_FP929043	GATAGTCAAGATGATATCACAGTCATT	0.333333	27
Eubacterium_rectale_FP929043	TTGACAACATCAACATTGACGCCGTGT	0.444444	27
Eubacterium_rectale_FP929043	TAGAATCCATCTTTATCTTGGCACAA	0.346154	26
Eubacterium_rectale_FP929043	TCTGATAGTTTATATAGTGCAAGTGCG	0.37037	27
Eubacterium_rectale_FP929043	CAAAGAGTATGATTTTTTTTG	0.238095	21
Eubacterium_rectale_FP929043	ACTGCTCCCTCACGAACAAGCATATCT	0.481481	27
Eubacterium_rectale_FP929043	TTGCTAAAGTAATAATAATTGATTTT	0.153846	26
Eubacterium_rectale_FP929043	TAAGAACTATTTGCTTGGCAGATGTG	0.384615	26
Eubacterium_rectale_FP929043	ATCCTCATCAGTTCCTATTAAAGCTA	0.346154	26
Eubacterium_rectale_FP929043	ACTATCCTCATTAGCCTGTAACTTCAAT	0.357143	28
Eubacterium_rectale_FP929043	CACTTTCTGTCGAATGCCCACAAACAT	0.444444	27
Eubacterium_rectale_FP929043	TTAGCATTAGGCTCAGATATTGAAAGACTG	0.366667	30
Eubacterium_rectale_FP929043	AATTCGAGAAACAATATCCCTTAACTG	0.333333	27
Eubacterium_rectale_FP929043	ACAGACAGCCTCTTGAGTAGGAATGGG	0.518519	27
Eubacterium_rectale_FP929043	TGTAATTCCACTGAGCTGCCAATTCAG	0.444444	27
Eubacterium_rectale_FP929043	ATGAAATATTGTCCAGTGCTGTCTTC	0.384615	26
Eubacterium_rectale_FP929043	CAGCTGAATTAATGGTTCCGTATTATC	0.37037	27
Eubacterium_rectale_FP929043	TGATTATTACATCTCATAACCGTTCTG	0.333333	27
Eubacterium_rectale_FP929043	TATGTAGATGAGCAAAGAAACTCTCAGAAGGGCAGC	0.444444	36
Eubacterium_rectale_FP929043	TCATTTTTTCATACGCATGATCAGAAAA	0.285714	28
Eubacterium_rectale_FP929043	CAGAGAGTATGATTTTTATTT	0.238095	21
Eubacterium_rectale_FP929043	ATATATACTCATTTCTAC	0.222222	18
Flavobacterium_branchiophilum_FQ859183	ACGATTCCGAAGAGGCAAAACAATAT	0.384615	26
Flavobacterium_branchiophilum_FQ859183	AATTCGTGGTTGATACTAAACCTGCGAG	0.428571	28
Flavobacterium_branchiophilum_FQ859183	CCAAAAAGGAGAAACCGCTTATGTCTTT	0.392857	28
Flavobacterium_branchiophilum_FQ859183	TGGCAAACCGTACGTGTCCACAAATT	0.461538	26
Flavobacterium_branchiophilum_FQ859183	AGGTCTATAATTTCATTCAGTAGTTT	0.269231	26
Flavobacterium_branchiophilum_FQ859183	TTATATCAGGTAGATCATTATTTGCAC	0.296296	27
Flavobacterium_branchiophilum_FQ859183	ATGGTAGCCAAATTGCTATTAATGGTT	0.333333	27
Flavobacterium_branchiophilum_FQ859183	TAATAGCAATATGTGGGATTATGAAT	0.269231	26
Flavobacterium_branchiophilum_FQ859183	ACAGGTGTTAAAATCACTGTATAATTT	0.259259	27
Flavobacterium_branchiophilum_FQ859183	AGCAAATGCCTTTTTATCAATAATCAT	0.259259	27
Flavobacterium_branchiophilum_FQ859183	AACCCAACCTGTTTCTTTCATTTCAA	0.346154	26
Flavobacterium_branchiophilum_FQ859183	TACCCAGTAGTCTCCCACTAAATCATA	0.407407	27
Flavobacterium_branchiophilum_FQ859183	ATTTTTAAGTCCACAAAATCAGAGGCT	0.333333	27
Flavobacterium_branchiophilum_FQ859183	TTCACAACTTTGCCACATTCTAGTGCAG	0.428571	28
Flavobacterium_branchiophilum_FQ859183	TTGCCGTCATTAAACCTTATTCCAGGTA	0.392857	28
Flavobacterium_branchiophilum_FQ859183	TTTATTTTAAATTCATGGTTCAAATGATA	0.172414	29
Flavobacterium_branchiophilum_FQ859183	TCGCATCGTATAGTTTTATTTCATTCAT	0.285714	28
Flavobacterium_branchiophilum_FQ859183	GTAATTGCGGTATTTTTGTATGCAATTTTTAA	0.25	32
Flavobacterium_branchiophilum_FQ859183	AGTGGATGCAAAAAATAAAAAACAAATAG	0.241379	29
Flavobacterium_branchiophilum_FQ859183	GGTGGTGCAAACATTTATGAAGTAGGCA	0.428571	28
Flavobacterium_branchiophilum_FQ859183	GATATACGTAATTGTAATGACATCGAT	0.296296	27
Flavobacterium_branchiophilum_FQ859183	TAGATATACGGTTACGGTTTGTTTTTTGT	0.310345	29
Flavobacterium_branchiophilum_FQ859183	ATACTCGCAAATCTTAGTCGTTGGAGT	0.407407	27
Flavobacterium_branchiophilum_FQ859183	GATTGCGTGAGCGTGGGCGAAGTACTCAATG	0.548387	31
Flavobacterium_branchiophilum_FQ859183	TGTACAGCATATTGAAGATAGTAGAAC	0.333333	27
Flavobacterium_branchiophilum_FQ859183	ACCCTCAGCTTTGTTTCGCTGTCGGCT	0.555556	27
Flavobacterium_branchiophilum_FQ859183	TAAAACAAATCTGTGTATTTTAAAAA	0.153846	26
Flavobacterium_branchiophilum_FQ859183	ACGAGAATAAAGCATTCTCATGGATTCAA	0.344828	29
Flavobacterium_branchiophilum_FQ859183	ATCTTTAACACCAGCGCAGAAAAACAT	0.37037	27
Flavobacterium_branchiophilum_FQ859183	AAAGAAGTATTTACGGTCAATACTGTACA	0.310345	29
Flavobacterium_branchiophilum_FQ859183	AGGGTTGTAATTCAATACCATAACCATTT	0.310345	29
Flavobacterium_branchiophilum_FQ859183	TGTAAATTATTACCAACCGCTATCCAT	0.333333	27
Flavobacterium_branchiophilum_FQ859183	TAACGATATCACCTCTACCGAATTGGTG	0.428571	28
Flavobacterium_branchiophilum_FQ859183	GTAAACGACCGCAATCGTCTAAGGCTTC	0.5	28
Flavobacterium_branchiophilum_FQ859183	ATTTAATGGGTTAAAAGCGTCTTTTGCTT	0.310345	29
Flavobacterium_branchiophilum_FQ859183	TTCTCGTGAAAAAAAGAAAGATGCCAC	0.37037	27
Francisella_hispaniensis_CP018093	AATGTCTAATAACACTTAGATTAAT	0.2	25
Francisella_noatunensis_CP022207.1_1	CTCTAAATGTTCGTATATATAGTATCAAGT	0.266667	30
Francisella_noatunensis_CP022207.1_1	TCGCTTGGGAAAGCCATTACCAAAAACAAA	0.4	30
Francisella_noatunensis_CP022207.1_1	ACCGCCTACACTTAATCAGTGTGATAAA	0.392857	28
Francisella_noatunensis_CP022207.1_1	GTTGTTAACGAGCATAAAAAGAGATTTTGG	0.333333	30
Francisella_noatunensis_CP022207.1_1	ACAAGAAATTGACAAGATCAGATCGACTG	0.37931	29
Francisella_philomiragia_CP000937.1_2	CTCATTTAGAAATTCAATTTTTAAATTCT	0.172414	29
Francisella_philomiragia_CP000937.1_2	AACCCTAAAGATTCTAACGGTGTTATT	0.333333	27
Francisella_philomiragia_CP000937.1_2	GAAATGGTGGAGTAATGCCAAGCAACG	0.481481	27
Francisella_philomiragia_CP000937.1_2	GGACTATTCTTTTAATGTTTGATACATA	0.25	28
Francisella_philomiragia_CP009343.1_2	CTCATTTAGAAATTCAATTTTTAAATTCT	0.172414	29
Francisella_philomiragia_CP009343.1_2	AACCCTAAAGATTCTAACGGTGTTATT	0.333333	27
Francisella_philomiragia_CP009343.1_2	GAAATGGTGGAGTAATGCCAAGCAACG	0.481481	27
Francisella_philomiragia_CP009343.1_2	GGACTATTCTTTTAATGTTTGATACATA	0.25	28
Francisella_philomiragia_CP009436.1_2	TATGTATCAAACATTAAAAGAATAGTCC	0.25	28
Francisella_philomiragia_CP009436.1_2	CGTTGCTTGGCATTACTCCACCATTTC	0.481481	27
Francisella_philomiragia_CP009436.1_2	AATAACACCGTTAGAATCTTTAGGGTT	0.333333	27
Francisella_philomiragia_CP009436.1_2	AGAATTTAAAAATTGAATTTCTAAATGAG	0.172414	29
Francisella_tularensis_novicida_CP000439.1_4	TTCAAGGTTCAATGCAAGCAATCAAACAA	0.344828	29
Francisella_tularensis_novicida_CP000439.1_4	GTCCATTTATTTCCGTCTCTCTTGCCTTTTGA	0.40625	32
Francisella_tularensis_novicida_CP000439.1_4	AAAAAACTTTATATCATAAATGAAAGTTT	0.137931	29
Francisella_tularensis_novicida_CP000439.1_4	TTGTTATCAGTAAGCGTATCTACTAGGTA	0.344828	29
Francisella_tularensis_novicida_CP000439.1_4	CTCAACAAGATAGAATTACCTTTTAATCT	0.275862	29
Francisella_tularensis_novicida_CP000439.1_4	AAAAAAATGACCTTCATAAATCGCTA	0.269231	26
Francisella_tularensis_novicida_CP000439.1_4	CGGCTACTAATACAAAAGGCTCTAGAC	0.444444	27
Francisella_tularensis_novicida_CP000439.1_4	TGAATTATCTGAAGGCACAGGAATAGTAGC	0.4	30
Francisella_tularensis_novicida_CP000439.1_4	TTTTAACAGTGGCCTTATTAAATGACTTCTC	0.322581	31
Francisella_tularensis_novicida_CP002557	GCCATCTCTTCATAATAACCACTCCAAA	0.392857	28
Francisella_tularensis_novicida_CP002557	TAACATATGGACTGGCATATTCTTCCAA	0.357143	28
Francisella_tularensis_novicida_CP002557	CTAACGTAGCGTAATAACCAGTAAGTAG	0.392857	28
Francisella_tularensis_novicida_CP002557	ATAAGGGTACGTTCGGTCAAATAGCTACT	0.413793	29
Francisella_tularensis_novicida_CP002557	AAACACTTCTGTCGTTTTTTCAAACATTT	0.275862	29
Francisella_tularensis_novicida_CP002557	ATGGATTATTACTTAACTGGAGTGTTTAC	0.310345	29
Francisella_tularensis_novicida_CP002557.1_2	GTAAACACTCCAGTTAAGTAATAATCCAT	0.310345	29
Francisella_tularensis_novicida_CP002557.1_2	AAATGTTTGAAAAAACGACAGAAGTGTTT	0.275862	29
Francisella_tularensis_novicida_CP002557.1_2	AGTAGCTATTTGACCGAACGTACCCTTAT	0.413793	29
Francisella_tularensis_novicida_CP002557.1_2	CTACTTACTGGTTATTACGCTACGTTAG	0.392857	28
Francisella_tularensis_novicida_CP002557.1_2	TTGGAAGAATATGCCAGTCCATATGTTA	0.357143	28
Francisella_tularensis_novicida_CP009353.1_1	GGCTTTCTTTAGCTTCTTCTAGAGTTTT	0.357143	28
Francisella_tularensis_novicida_CP009353.1_1	ATATAACTATCACCAGCAATCTGTACGAG	0.37931	29
Francisella_tularensis_novicida_CP009353.1_1	TAAAATGGTTGTTTAGTTATGTCAGAAAT	0.241379	29
Francisella_tularensis_novicida_CP009353.1_1	AATTTACGCCGTATTTCATTTCATCTCC	0.357143	28
Francisella_tularensis_novicida_CP009353.1_1	GCAGAGATCATTAAACCAATAGCACAGC	0.428571	28
Francisella_tularensis_novicida_CP009353.1_1	TCTGTAGAAATTCCTAGTTTTTGAGATG	0.321429	28
Francisella_tularensis_novicida_CP009353.1_1	GGCTCAAGTAATATCAATAATTTAGAAT	0.25	28
Francisella_tularensis_novicida_CP009353.1_1	ATTTATGTGATGACTGGTGTTGCTAATG	0.357143	28
Francisella_tularensis_novicida_CP009353.1_1	ACAATTATATCCATCACATACCCCTCTAA	0.344828	29
Francisella_tularensis_novicida_CP009353.1_1	TGTATTTTAGATAGGTTTCAGCAGAAAT	0.285714	28
Francisella_tularensis_novicida_CP009353.1_1	AGTGCTTAAGAAAATCGAAAGTATTTGGG	0.344828	29
Francisella_tularensis_novicida_CP009353.1_1	TATAATGAAAATACGATTATTACTTAGAAG	0.2	30
Francisella_tularensis_novicida_CP009353.1_1	ATTGTCAAAACATAAGCAGCTGCTTCAAATAT	0.3125	32
Francisella_tularensis_novicida_CP009353.1_1	GTCGCTTTATCATCTTTATACTCCTTAA	0.321429	28
Francisella_tularensis_novicida_CP009353.1_1	TTTATCTGCTCTCTGGCTACTTTCAACAC	0.413793	29
Francisella_tularensis_novicida_CP009353.1_1	GCGTGGGTGTTGGGCTTTTTATTGCGTTAT	0.466667	30
Francisella_tularensis_novicida_CP009353.1_1	CTTGCAAAGTGTAGTGTGTTACACCTTA	0.392857	28
Francisella_tularensis_novicida_CP009633.1_1	GAGAAGTCATTTAATAAGGCCACTGTTAAAA	0.322581	31
Francisella_tularensis_novicida_CP009633.1_1	GCTACTATTCCTGTGCCTTCAGATAATTCA	0.4	30
Francisella_tularensis_novicida_CP009633.1_1	GTCTAGAGCCTTTTGTATTAGTAGCCG	0.444444	27
Francisella_tularensis_novicida_CP009633.1_1	TAGCGATTTATGAAGGTCATTTTTTT	0.269231	26
Francisella_tularensis_novicida_CP009633.1_1	AGATTAAAAGGTAATTCTATCTTGTTGAG	0.275862	29
Francisella_tularensis_novicida_CP009633.1_1	TACCTAGTAGATACGCTTACTGATAACAA	0.344828	29
Francisella_tularensis_novicida_CP009633.1_1	AAACTTTCATTTATGATATAAAGTTTTTT	0.137931	29
Francisella_tularensis_novicida_CP009633.1_1	TCAAAAGGCAAGAGAGACGGAAATAAATGGAC	0.40625	32
Francisella_tularensis_novicida_CP009633.1_1	TTGTTTGATTGCTTGCATTGAACCTTGAA	0.344828	29
Francisella_tularensis_novicida_CP009653	AGGTCAGAGCTTATATCGTAACCAGCAA	0.428571	28
Francisella_tularensis_novicida_CP009653	GGCTTTCTTTAGCTTCTTCTAGAGTTTT	0.357143	28
Francisella_tularensis_novicida_CP009653	ATATAACTATCACCAGCAATCTGTACGAG	0.37931	29
Francisella_tularensis_novicida_CP009653	TAAAATGGTTGTTTAGTTATGTCAGAAAT	0.241379	29
Francisella_tularensis_novicida_CP009653	AATTTACGCCGTATTTCATTTCATCTCC	0.357143	28
Francisella_tularensis_novicida_CP009653	GCAGAGATCATTAAACCAATAGCACAGC	0.428571	28
Francisella_tularensis_novicida_CP009653	TCTGTAGAAATTCCTAGTTTTTGAGATG	0.321429	28
Francisella_tularensis_novicida_CP009653	GGCTCAAGTAATATCAATAATTTAGAAT	0.25	28
Francisella_tularensis_novicida_CP009653	ATTTATGTGATGACTGGTGTTGCTAATG	0.357143	28
Francisella_tularensis_novicida_CP009653	ACAATTATATCCATCACATACCCCTCTAA	0.344828	29
Francisella_tularensis_novicida_CP009653	TGTATTTTAGATAGGTTTCAGCAGAAAT	0.285714	28
Francisella_tularensis_novicida_CP009653	AGTGCTTAAGAAAATCGAAAGTATTTGGG	0.344828	29
Francisella_tularensis_novicida_CP009653	TATAATGAAAATACGATTATTACTTAGAAG	0.2	30
Francisella_tularensis_novicida_CP009653	ATTGTCAAAACATAAGCAGCTGCTTCAAATAT	0.3125	32
Francisella_tularensis_novicida_CP009653	GTCGCTTTATCATCTTTATACTCCTTAA	0.321429	28
Francisella_tularensis_novicida_CP009653	TTTATCTGCTCTCTGGCTACTTTCAACAC	0.413793	29
Francisella_tularensis_novicida_CP009653	GCGTGGGTGTTGGGCTTTTTATTGCGTTAT	0.466667	30
Francisella_tularensis_novicida_CP009653	CTTGCAAAGTGTAGTGTGTTACACCTTA	0.392857	28
Francisella_tularensis_novicida_CP009653.1_2	ATATTTGAAGCAGCTGCTTATGTTTTGACAAT	0.3125	32
Francisella_tularensis_novicida_CP009653.1_2	TAAGGTGTAACACACTACACTTTGCAAG	0.392857	28
Francisella_tularensis_novicida_CP009653.1_2	ATAACGCAATAAAAAGCCCAACACCCACGC	0.466667	30
Francisella_tularensis_novicida_CP009653.1_2	GTGTTGAAAGTAGCCAGAGAGCAGATAAA	0.413793	29
Francisella_tularensis_novicida_CP009653.1_2	TTAAGGAGTATAAAGATGATAAAGCGAC	0.321429	28
Francisella_tularensis_novicida_CP009653.1_2	ATATTTGAAGCAGCTGCTTATGTTTTGACAAT	0.3125	32
Francisella_tularensis_novicida_CP009653.1_2	CTTCTAAGTAATAATCGTATTTTCATTATA	0.2	30
Francisella_tularensis_novicida_CP009653.1_2	CCCAAATACTTTCGATTTTCTTAAGCACT	0.344828	29
Francisella_tularensis_novicida_CP009653.1_2	ATTTCTGCTGAAACCTATCTAAAATACA	0.285714	28
Francisella_tularensis_novicida_CP009653.1_2	TTAGAGGGGTATGTGATGGATATAATTGT	0.344828	29
Francisella_tularensis_novicida_CP009653.1_2	CATTAGCAACACCAGTCATCACATAAAT	0.357143	28
Francisella_tularensis_novicida_CP009653.1_2	ATTCTAAATTATTGATATTACTTGAGCC	0.25	28
Francisella_tularensis_novicida_CP009653.1_2	CATCTCAAAAACTAGGAATTTCTACAGA	0.321429	28
Francisella_tularensis_novicida_CP009653.1_2	GCTGTGCTATTGGTTTAATGATCTCTGC	0.428571	28
Francisella_tularensis_novicida_CP009653.1_2	GGAGATGAAATGAAATACGGCGTAAATT	0.357143	28
Francisella_tularensis_novicida_CP009653.1_2	ATTTCTGACATAACTAAACAACCATTTTA	0.241379	29
Francisella_tularensis_novicida_CP009653.1_2	CTCGTACAGATTGCTGGTGATAGTTATAT	0.37931	29
Francisella_tularensis_novicida_CP009653.1_2	AAAACTCTAGAAGAAGCTAAAGAAAGCC	0.357143	28
Francisella_tularensis_novicida_CP009653.1_2	TTGCTGGTTACGATATAAGCTCTGACCT	0.428571	28
Francisella_tularensis_novicida_CP010103.1_1	TCTGTAGAAATTCCTAGTTTTTGAGATG	0.321429	28
Francisella_tularensis_novicida_CP010103.1_1	GGCTCAAGTAATATCAATAATTTAGAAT	0.25	28
Francisella_tularensis_novicida_CP010103.1_1	ATTTATGTGATGACTGGTGTTGCTAATG	0.357143	28
Francisella_tularensis_novicida_CP010103.1_1	ACAATTATATCCATCACATACCCCTCTAA	0.344828	29
Francisella_tularensis_novicida_CP010103.1_1	TGTATTTTAGATAGGTTTCAGCAGAAAT	0.285714	28
Francisella_tularensis_novicida_CP010103.1_1	AGTGCTTAAGAAAATCGAAAGTATTTGGG	0.344828	29
Francisella_tularensis_novicida_CP010103.1_1	TATAATGAAAATACGATTATTACTTAGAAG	0.2	30
Francisella_tularensis_novicida_CP010103.1_1	ATTGTCAAAACATAAGCAGCTGCTTCAAATAT	0.3125	32
Francisella_tularensis_novicida_CP010103.1_1	GTCGCTTTATCATCTTTATACTCCTTAA	0.321429	28
Francisella_tularensis_novicida_CP010103.1_1	TTTATCTGCTCTCTGGCTACTTTCAACAC	0.413793	29
Francisella_tularensis_novicida_CP010103.1_1	GCGTGGGTGTTGGGCTTTTTATTGCGTTAT	0.466667	30
Francisella_tularensis_novicida_CP010103.1_1	CTTGCAAAGTGTAGTGTGTTACACCTTA	0.392857	28
Francisella_tularensis_novicida_CP016635	GTGTTTCATGTGTATTATTAAATTTATTGT	0.2	30
Francisella_tularensis_novicida_CP016635	TATTGTTGTGATTCTTCATCTTGTGGG	0.37037	27
Francisella_tularensis_novicida_CP016635	TAGACTCTTGGCACCTTTGTGGCACCTCA	0.517241	29
Francisella_tularensis_novicida_CP016635	ACTTGAATTAGAATGGTGTTTGTATTTA	0.25	28
Francisella_tularensis_novicida_CP016635	AGAAAGCCATGCGAACGTTTTTACGCTC	0.464286	28
Francisella_tularensis_novicida_CP016635	AGCTTTAGGGCTACTGGTTCTTTTTTAGT	0.37931	29
Francisella_tularensis_novicida_CP016635	CTTGTTAGCCATTGGACGACCATTGTCA	0.464286	28
Francisella_tularensis_novicida_CP016635	TCTTGCTTAAGAGTCGGCTTAGTGTAGAG	0.448276	29
Francisella_tularensis_novicida_CP016635	TTTGTATGTGTTTTACCTTTTTATTCCA	0.25	28
Francisella_tularensis_novicida_CP016635	GATGTAGCTGAAATATCGTTTTTGAGGT	0.357143	28
Francisella_tularensis_novicida_CP016635	CTGCGTGATGGTGAGTTTTTTATTAT	0.346154	26
Francisella_tularensis_novicida_CP016635	GCGGAGTTGCTTTAGATGAAAGTAGTATT	0.37931	29
Francisella_tularensis_novicida_CP016635	ATTGACTATGTGTTCCAAAATGGAACAAC	0.344828	29
Francisella_tularensis_novicida_CP016635	TCAAAGGGAAATAAGATTCAATTCTAATCT	0.266667	30
Francisella_tularensis_novicida_CP016635	GAATTATTGTTGCACGGCTCAGTTACA	0.407407	27
Francisella_tularensis_novicida_CP016635	ATAGCCGGAGACTACGTAAGCATAGCAG	0.5	28
Francisella_tularensis_novicida_CP016635	AATATAATAAATCTAAAGATAGAAAATTA	0.103448	29
Francisella_tularensis_novicida_CP016635	GTTATCGCTGCTTCTTTTGTCATTTTATC	0.344828	29
Francisella_tularensis_novicida_CP016635	TAAATGATATAGACCCGTAGATACTATAT	0.275862	29
Francisella_tularensis_novicida_CP016635	TCTAGTATCTCTCTAGCTTTTTCTGATA	0.321429	28
Francisella_tularensis_novicida_CP016635	TGGAGACCACAATAAAATATATGCGATT	0.321429	28
Francisella_tularensis_novicida_CP016635	CAAATATATTTCTGCATCCTAAACTATC	0.285714	28
Francisella_tularensis_novicida_CP016635	AAAAAAGAATAATTGGCGAGATTGAAA	0.259259	27
Francisella_tularensis_novicida_CP016635	GAAACATCTTCTCTTAACTCCTGGTATCG	0.413793	29
Francisella_tularensis_novicida_CP016635	TATGAGTGTTAATTTCGATCTGAATAAAT	0.241379	29
Francisella_tularensis_novicida_CP016635	GATATTGGCTTATCATTAAGCAATGTATAG	0.3	30
Francisella_tularensis_novicida_CP016635.1_2	CTATACATTGCTTAATGATAAGCCAATATC	0.3	30
Francisella_tularensis_novicida_CP016635.1_2	ATTTATTCAGATCGAAATTAACACTCATA	0.241379	29
Francisella_tularensis_novicida_CP016635.1_2	CGATACCAGGAGTTAAGAGAAGATGTTTC	0.413793	29
Francisella_tularensis_novicida_CP016635.1_2	TTTCAATCTCGCCAATTATTCTTTTTT	0.259259	27
Francisella_tularensis_novicida_CP016635.1_2	GATAGTTTAGGATGCAGAAATATATTTG	0.285714	28
Francisella_tularensis_novicida_CP016635.1_2	AATCGCATATATTTTATTGTGGTCTCCA	0.321429	28
Francisella_tularensis_novicida_CP016635.1_2	TATCAGAAAAAGCTAGAGAGATACTAGA	0.321429	28
Francisella_tularensis_novicida_CP016635.1_2	ATATAGTATCTACGGGTCTATATCATTTA	0.275862	29
Francisella_tularensis_novicida_CP016635.1_2	GATAAAATGACAAAAGAAGCAGCGATAAC	0.344828	29
Francisella_tularensis_novicida_CP016635.1_2	TAATTTTCTATCTTTAGATTTATTATATT	0.103448	29
Francisella_tularensis_novicida_CP016635.1_2	CTGCTATGCTTACGTAGTCTCCGGCTAT	0.5	28
Francisella_tularensis_novicida_CP016635.1_2	TGTAACTGAGCCGTGCAACAATAATTC	0.407407	27
Francisella_tularensis_novicida_CP016635.1_2	AGATTAGAATTGAATCTTATTTCCCTTTGA	0.266667	30
Francisella_tularensis_novicida_CP016635.1_2	GTTGTTCCATTTTGGAACACATAGTCAAT	0.344828	29
Francisella_tularensis_novicida_CP016635.1_2	AATACTACTTTCATCTAAAGCAACTCCGC	0.37931	29
Francisella_tularensis_novicida_CP016635.1_2	ATAATAAAAAACTCACCATCACGCAG	0.346154	26
Francisella_tularensis_novicida_CP016635.1_2	ACCTCAAAAACGATATTTCAGCTACATC	0.357143	28
Francisella_tularensis_novicida_CP016635.1_2	TGGAATAAAAAGGTAAAACACATACAAA	0.25	28
Francisella_tularensis_novicida_CP016635.1_2	CTCTACACTAAGCCGACTCTTAAGCAAGA	0.448276	29
Francisella_tularensis_novicida_CP016635.1_2	TGACAATGGTCGTCCAATGGCTAACAAG	0.464286	28
Francisella_tularensis_novicida_CP016635.1_2	ACTAAAAAAGAACCAGTAGCCCTAAAGCT	0.37931	29
Francisella_tularensis_novicida_CP016635.1_2	GAGCGTAAAAACGTTCGCATGGCTTTCT	0.464286	28
Francisella_tularensis_novicida_CP016635.1_2	TAAATACAAACACCATTCTAATTCAAGT	0.25	28
Francisella_tularensis_novicida_CP016635.1_2	TGAGGTGCCACAAAGGTGCCAAGAGTCTA	0.517241	29
Francisella_tularensis_novicida_CP016635.1_2	CCCACAAGATGAAGAATCACAACAATA	0.37037	27
Francisella_tularensis_novicida_CP016635.1_2	ACAATAAATTTAATAATACACATGAAACAC	0.2	30
Francisella_tularensis_novicida_CP021490.1_1	AAGATGATAGTAAGGCACAGTATTTCA	0.333333	27
Francisella_tularensis_novicida_CP021490.1_1	TTATATACGCATTGCTTTAATACATGGTA	0.275862	29
Francisella_tularensis_novicida_CP021490.1_1	TGTTCTATAATAAAACTTTTAATCTTTTAT	0.133333	30
Francisella_tularensis_novicida_CP021490.1_1	TTAATTCTATAGGTAAAAATGAGTTCTT	0.214286	28
Francisella_tularensis_novicida_CP021490.1_1	GCGGTGTAAGGTTCGTCAAGCTTATCGG	0.535714	28
Francisella_tularensis_novicida_CP021490.1_1	GGCGCTAGTAAGTGGGAGCTACACTACTAG	0.533333	30
Francisella_tularensis_novicida_CP021490.1_1	CAAAGTGATTATTGTTCAATGAATGTTGAG	0.3	30
Francisella_tularensis_novicida_CP021490.1_1	AAGGCTATATTCGTACAACAGAATTAACAT	0.3	30
Francisella_tularensis_novicida_CP021490.1_1	TAGCACCTGTTTAACGAACTCTAAATC	0.37037	27
Francisella_tularensis_novicida_CP021490.1_1	AAAACCTTGCAAAATCAGAGCTTGAGA	0.37037	27
Francisella_tularensis_novicida_CP021490.1_1	ATGAAATACTCTTGTCCTTTGGGTGTGA	0.392857	28
Lachnospiraceae_bacterium_AP018536.1_2	CACGGTTGACTGATAGATGTGTCGATAGTT	0.433333	30
Lachnospiraceae_bacterium_AP018536.1_2	GTGAAACACCCTATATTGCTGTCACGGTT	0.448276	29
Lachnospiraceae_bacterium_AP018536.1_2	TTAAGTGGTGCTTAGTGATTTTTTTATTGTTAAATA	0.222222	36
Lachnospiraceae_bacterium_AP018536.1_2	ATGTGGGTATAGCCTATGTGGTTACCGGGTT	0.483871	31
Lachnospiraceae_bacterium_NZ_JNKS01000011	CGGTCTCGCAAAGAATGGATATACTCAT	0.428571	28
Lachnospiraceae_bacterium_NZ_JNKS01000011	CGCATCCAGTAAAGCGGCACTTAGCTTTT	0.482759	29
Lachnospiraceae_bacterium_NZ_JNKS01000011	TCAGTGGTGGAAAGTCCTCTCCCACT	0.538462	26
Lachnospiraceae_bacterium_NZ_JNKS01000011	TTAAGGGTGCAAATGATCGCAATTGA	0.384615	26
Lachnospiraceae_bacterium_NZ_JNKS01000011	TCTATATTTTAACATTTATACGCAAAAA	0.178571	28
Lachnospiraceae_bacterium_NZ_JNKS01000011	GCAAAGTTCCCAGAGTTTGAAGTGGT	0.461538	26
Lachnospiraceae_bacterium_NZ_JNKS01000011	TAAAGCTATTATATAGAGCAGGGTTC	0.346154	26
Lachnospiraceae_bacterium_NZ_JNKS01000011	CATGTAACCTCCATTTTTATACTTCTT	0.296296	27
Lachnospiraceae_bacterium_NZ_JNKS01000011	TAACGCGCTTGCTCCAAGTGTAGGGAG	0.555556	27
Lachnospiraceae_bacterium_NZ_JNKS01000011	CTGGAATGCAGAAATATTCTTGTCAG	0.384615	26
Lachnospiraceae_bacterium_NZ_JNKS01000011	GTATAAGTAGTTGACATTATATAACA	0.230769	26
Lachnospiraceae_bacterium_NZ_JQKK01000008	GCAAAGTGTACGAACCCTAGTATTTTT	0.37037	27
Lachnospiraceae_bacterium_NZ_JQKK01000008	GGGCAAGTCTCAACTATAGTCGTAC	0.48	25
Lachnospiraceae_bacterium_NZ_JQKK01000008	GTTATACAAATCTTATTACTCCTCTGAT	0.285714	28
Lachnospiraceae_bacterium_NZ_JQKK01000008	AGAAAGCACCACATGACGCAAAGCCCT	0.518519	27
Lachnospiraceae_bacterium_NZKL370807	TCGCCTGTCCATAGTATATGTAAATTT	0.333333	27
Lachnospiraceae_bacterium_NZKL370807	TGGCAGAGGTTCACGTTGATGAAGGC	0.538462	26
Lachnospiraceae_bacterium_NZKL370807	CTCTAATGATTGCAGAATTTCTTGGAAT	0.321429	28
Lachnospiraceae_bacterium_NZKL370807	AAGATCCTCAATCTGTTCATCTTTA	0.32	25
Lachnospiraceae_bacterium_NZKL370807	GAAGAATCTTACAACTACATCTGCTC	0.384615	26
Lachnospiraceae_bacterium_NZKL370807	GTCTCAGCTTGCTTGGTTGACCTTGCAA	0.5	28
Lachnospiraceae_bacterium_NZKL370807	AGACAAACCTTCGGTTTTTCTCAGATG	0.407407	27
Leptospira_inadai_NZ_AHMM02000017	TGGCTCTTTTAAACATATTTCCATTAT	0.259259	27
Leptospira_inadai_NZ_AHMM02000017	AACTCCATCCGGGGAAAAAGAAACA	0.44	25
Leptospira_inadai_NZ_AHMM02000017	AAATACTGGGCAGATCTCTTGAACAT	0.384615	26
Leptospira_inadai_NZ_AHMM02000017	CGAACATGATTCGATTATTGTAGAAG	0.346154	26
Leptospira_inadai_NZ_AHMM02000017	ATTATCCGCTCCCGCTTCCGTCTCCG	0.615385	26
Leptospira_inadai_NZ_AHMM02000017	TCTAGCTGTTACGACTAAATCGTAAGC	0.407407	27
Leptospira_inadai_NZ_AHMM02000017	AGTTGCATATTTTAATAGAGATTGTAT	0.222222	27
Leptospira_inadai_NZ_AHMM02000017	ATCTGCGAAAGAATACGATAACTGTGA	0.37037	27
Leptospira_inadai_NZ_AHMM02000017	GTGATTAACTCATAGGCTTTTCCGGA	0.423077	26
Moraxella_bovis_CP030241.1_2	ACTTTTTTAGAGCCAGTACATATAATA	0.259259	27
Moraxella_bovis_CP030241.1_2	GTTTGGCGGTGGTTTTGACTTGACAC	0.5	26
Moraxella_bovis_CP030241.1_2	TAGTGAGCTAATGCAATATTTAGAG	0.32	25
Moraxella_bovis_CP030241.1_2	CACAAAATGACAAAATATTAACTATTAT	0.178571	28
Moraxella_bovis_CP030241.1_2	CGACGTTTTCGCCGTAACAAAGCCGCC	0.592593	27
Moraxella_bovis_CP030241.1_2	TATGTATTTACGCTATAAAAAAATGTTG	0.214286	28
Moraxella_bovis_CP030241.1_2	TCATAAAGTCTCTGGCGGTGCTAAAAAG	0.428571	28
Moraxella_bovis_CP030241.1_2	CCTTTATCGGCTGCCACCACCAAATAGGG	0.551724	29
Moraxella_bovis_CP030241.1_2	GGAATGTGTACTTTCATCGCCGTATC	0.461538	26
Moraxella_bovis_CP030241.1_2	TCGGCAACTTTTCAATATCTGCTTTCGTA	0.37931	29
Moraxella_bovis_CP030241.1_2	GTCGTTTGCATGTCGCTCTATGGGGTT	0.518519	27
Moraxella_bovis_CP030241.1_2	ATGATTGGCTAGCATTAAAGTTTATTGGGT	0.333333	30
Moraxella_bovis_CP030241.1_2	CCAGAGAAAAATTAGATTTGACACAG	0.346154	26
Moraxella_bovis_CP030241.1_2	GAAAGACTGGTTAAAATTGCTGGCACGT	0.428571	28
Moraxella_bovis_CP030241.1_2	ACACCAAACCTTGCTGATAAGCAAGAAAA	0.37931	29
Moraxella_bovis_CP030241.1_2	GTTTTTGCATGATTGCACCTGTATTTT	0.333333	27
Moraxella_bovis_CP030241.1_2	GGTTATACACCATTTTTGGTGTAATCAA	0.321429	28
Moraxella_bovis_CP030241.1_2	CCCAATACATTCATACTCATTTGCGTGGA	0.413793	29
Moraxella_bovis_CP030241.1_2	CCTAAAATATGGCGTTTCACATTCAATG	0.357143	28
Moraxella_bovis_CP030241.1_2	AAGTGAAAACCAAAGGTAAGCTAAAAG	0.333333	27
Moraxella_bovis_CP030241.1_2	TGCACATACTCCACCGCTTGATGTACCT	0.5	28
Moraxella_bovis_CP030241.1_2	ACGACTTCATTAAGTTGGTTTAGATAA	0.296296	27
Moraxella_bovis_CP030241.1_2	AGTATACGCCGTCTTAGTCTTAGGCAG	0.481481	27
Moraxella_bovis_CP030241.1_2	TATATAGTCAAAACTTTTTAAAGGGTT	0.222222	27
Moraxella_bovis_CP030241.1_2	TTGACTATGGCAAAGCCTTTGACTGTGT	0.428571	28
Moraxella_bovis_CP030241.1_2	ATAATTGGCGTATCTCATACCAAGTAAA	0.321429	28
Moraxella_bovis_CP030241.1_2	ATTATGACAGATGACCGCTATCCAGAC	0.444444	27
Moraxella_bovis_CP030241.1_2	TGATAACTGGGATTGTATGGTTTGTGG	0.407407	27
Moraxella_bovis_CP030241.1_2	TACCTTCGTCCATAATCCAGCCGACGC	0.555556	27
Moraxella_bovoculi_AOMT01000011	GCCCACGCTTCGCGCGTGGCGATTAAT	0.62963	27
Moraxella_bovoculi_AOMT01000011	GTTTAAAACGTTCAGAAACCGCCTTATT	0.357143	28
Moraxella_bovoculi_AOMT01000011	ATTAGGGGGGATAGGGTCTAGTTCACC	0.518519	27
Moraxella_bovoculi_AOMT01000011	AAAGATTTAATTTCATAAGCATCCCGAA	0.285714	28
Moraxella_bovoculi_AOMT01000011	AAATCAGTCATCTGGATTACCTCCACTT	0.392857	28
Moraxella_bovoculi_AOMT01000011	TTTTACATTTGCGCTGTGCTACAATGG	0.407407	27
Moraxella_bovoculi_AOMT01000011	TGAAATTAGTAGCTTTTAGACTGCTAA	0.296296	27
Moraxella_bovoculi_AOMT01000011	GGAAAAGCAGTAATAATCTCTGATGCTGT	0.37931	29
Moraxella_bovoculi_AOMT01000011	AGGCATTGCGCCTCCTGTTTAATAAAA	0.407407	27
Moraxella_bovoculi_AOMT01000011	TACCGCCTTACGCTTGCATATAGATAA	0.407407	27
Moraxella_bovoculi_AOMT01000011	GTAGTGGCACTGTCTTTTAAGCCCAAA	0.444444	27
Moraxella_bovoculi_AOMT01000011	ATTGCCTCCCCAACTCACGAAAACCCCTTAT	0.483871	31
Moraxella_bovoculi_AOMT01000011	AACGACAAACCCCCACAATGTGCGTT	0.5	26
Moraxella_bovoculi_AOMT01000011	GCTCGCCTTCGCCCACCCACGCCGATGTA	0.689655	29
Moraxella_bovoculi_AOMT01000011	TTCATCTGATCAAGCTCAAGCCCATC	0.461538	26
Moraxella_bovoculi_AOMT01000011	CAACGCTGTGGTTCTATGTGGTGCTGT	0.518519	27
Moraxella_bovoculi_CP011374.1_1	TTTTGCAAGGCTTTGCGGTTAATTCCC	0.444444	27
Moraxella_bovoculi_CP011374.1_1	CTGTTAGAGTCCGTCCAGCTATCTTAG	0.481481	27
Moraxella_bovoculi_CP011374.1_1	TTATGACGCTATATTATAGCATGGTTT	0.296296	27
Moraxella_bovoculi_CP011374.1_1	ATGGCGATGCAATCAAAAGGATTAATCT	0.357143	28
Moraxella_bovoculi_CP011374.1_1	TTAAGTCTGGCTCATCACTGCACAGAT	0.444444	27
Moraxella_bovoculi_CP011374.1_1	AGCTTCAACCTTAACCGTGTCAGTTGTC	0.464286	28
Moraxella_bovoculi_CP011374.1_1	AGATTTAACTATTGACAATACGCCAGCTT	0.344828	29
Moraxella_bovoculi_CP011374.1_1	ACAACCACTCGGTTTTTTGATTTGACAT	0.357143	28
Moraxella_bovoculi_CP011374.1_1	GGAAACAGTAAGGTGTAGTATTATGGC	0.407407	27
Moraxella_bovoculi_CP011374.1_1	CCGTCCAGCATTATCTCGATGCGATAG	0.518519	27
Moraxella_bovoculi_CP011374.1_1	ATGATTTGCGCAGGACGGCACGCACCAA	0.571429	28
Moraxella_bovoculi_CP011374.1_1	AGATAGGCATTTGAAAAAGAATTTATCT	0.25	28
Moraxella_bovoculi_CP011374.1_1	TCAATCATTAGCCATGCCAAACTTTTAT	0.321429	28
Moraxella_bovoculi_CP011374.1_1	TTCGTCCTTTATACGCACCCCTTGCTT	0.481481	27
Moraxella_bovoculi_CP011374.1_1	AAAGATGGTTGCGATGGTATTTTTGGG	0.407407	27
Moraxella_bovoculi_CP011374.1_1	GCTTCAATCTTGGCAAGTGTTTCATCA	0.407407	27
Moraxella_bovoculi_CP011374.1_1	AGACTAATAAGAGAGTATATTCGCACCGA	0.37931	29
Moraxella_bovoculi_CP011374.1_1	TTTTTGTCAACTCTCAACCCTTGATTT	0.333333	27
Moraxella_bovoculi_CP011374.1_1	GTAAGTATATTTGGACACGCACCAAG	0.423077	26
Moraxella_bovoculi_CP011374.1_1	AGTGTTAAATACGAAACACCACCCCGCTC	0.482759	29
Moraxella_bovoculi_CP011374.1_1	CCGAGCAAGAACAAGCGCAGATTGAATA	0.464286	28
Moraxella_bovoculi_CP011374.1_1	AGTGGTCGGGCGATGAATTCCATAAG	0.5	26
Moraxella_bovoculi_CP011374.1_1	ACCATTAGCAGACAGTGAAAATGGGGGT	0.464286	28
Moraxella_bovoculi_CP011374.1_1	AACAATCGACATAATTATCGATGCATA	0.296296	27
Moraxella_bovoculi_CP011374.1_1	AATAGTCGCCTTACGGCTATCGGTTAT	0.444444	27
Moraxella_bovoculi_CP011374.1_1	TCTAAACTTAGTCTTAGCACCTTTGT	0.346154	26
Moraxella_bovoculi_CP011374.1_1	TGTAGCGACATATATATTACTACTTAT	0.259259	27
Moraxella_bovoculi_CP011374.1_1	GAGACTTCAAATATAGGCATTTTTTT	0.269231	26
Moraxella_bovoculi_CP011374.1_1	TAGTAGCTGTCTAATATCTCTTGTTG	0.346154	26
Moraxella_bovoculi_CP011374.1_1	ACACCGCCACGCCTACCCCATCCCCTG	0.703704	27
Moraxella_bovoculi_CP011374.1_1	TTATGGATTAATATCATGTGATTGGAT	0.259259	27
Moraxella_bovoculi_CP011374.1_1	GGGAAAGGCTGGGGCTATTGCCAGATGA	0.571429	28
Moraxella_bovoculi_CP011376.1_1	ATGGTTAATGATGATAACCCAGATTTAAT	0.275862	29
Moraxella_bovoculi_CP011376.1_1	ATATCCATCTACTAACCATCGCAAAAA	0.333333	27
Moraxella_bovoculi_CP011376.1_1	GTTTTGAATATAGGACTAATGCCCCTAA	0.357143	28
Moraxella_bovoculi_CP011376.1_1	ATTGGTTTGTGTAACGGGGAAATTAAG	0.37037	27
Moraxella_bovoculi_CP011376.1_1	TTTAGAAATCACGGATCATTATATATGT	0.25	28
Moraxella_bovoculi_CP011376.1_1	TCAAAAATGGTAGCATTTGTTAAGAAT	0.259259	27
Moraxella_bovoculi_CP011376.1_1	ATTGATGTAAACATCGATGGTGTGGTT	0.37037	27
Moraxella_bovoculi_CP011376.1_1	TGCAGGTGGTGAATCAGCGACACATTC	0.518519	27
Moraxella_bovoculi_CP011376.1_1	CCTCCTCAATTAGCCTTGCAAAATGATAT	0.37931	29
Moraxella_bovoculi_CP011376.1_1	TCATGGCGTAGTTGCTACGCTGTAAT	0.461538	26
Moraxella_bovoculi_CP011376.1_1	TGGGAATATTATAGCAGATTTATTTAATT	0.206897	29
Moraxella_bovoculi_CP011376.1_1	AAGCGGTTCACAAAAACCACTCATTAAG	0.392857	28
Moraxella_bovoculi_CP011376.1_1	CTAAATGCCGTGTCGTTTTGGTTCTTAT	0.392857	28
Moraxella_bovoculi_CP011376.1_1	CTGTGGCTTTCATGTCACACCTCTCA	0.5	26
Moraxella_bovoculi_CP011376.1_1	GGAACCTGTTCGCCGCTTGGATGTTAC	0.555556	27
Moraxella_bovoculi_CP011376.1_1	GTCTTGGATAGTATGCAGTCGCATCAGCG	0.517241	29
Moraxella_bovoculi_CP011377.1_1	ACAGTATGTATTAACGAATTGGGCGAT	0.37037	27
Moraxella_bovoculi_CP011377.1_1	CAATCTCAAAATTGACCCTATCTTGATTTG	0.333333	30
Moraxella_bovoculi_CP011377.1_1	AGTGATTTCCACCCCACGGCTTGCCAA	0.555556	27
Moraxella_bovoculi_CP011377.1_1	TTACTAAAAGCATACAGTCTGTTATAG	0.296296	27
Moraxella_bovoculi_CP011377.1_1	CCCATTCTAAGCTTGCGATTGCCATAAGT	0.448276	29
Moraxella_bovoculi_CP011377.1_1	AATGTTTTGGTAAATGTCCATTGTGCC	0.37037	27
Moraxella_bovoculi_CP011377.1_1	AGAAAGCGACAGATGGGCGAGTAACAG	0.518519	27
Moraxella_bovoculi_CP011377.1_1	CAGACGGTGGTGCGTGATTTGTCAGCAC	0.571429	28
Moraxella_bovoculi_CP011377.1_1	TCATGGCGTAGTTGCTACGCTGTAAT	0.461538	26
Moraxella_bovoculi_CP011377.1_1	TGGGAATATTATAGCAGATTTATTTAATT	0.206897	29
Moraxella_bovoculi_CP011377.1_1	CTAAATGCCGTGTCGTTTTGGTTCTTAT	0.392857	28
Moraxella_bovoculi_CP011377.1_1	CTGTGGCTTTCATGTCACACCTCTCA	0.5	26
Moraxella_bovoculi_CP011377.1_1	GGAACCTGTTCGCCGCTTGGATGTTAC	0.555556	27
Moraxella_bovoculi_CP011377.1_1	GTCTTGGATAGTATGCAGTCGCATCAGCG	0.517241	29
Moraxella_bovoculi_CP011378.1_1	TTTAGAAATCACGGATCATTATATATGT	0.25	28
Moraxella_bovoculi_CP011378.1_1	TCAAAAATGGTAGCATTTGTTAAGAAT	0.259259	27
Moraxella_bovoculi_CP011378.1_1	ATTGATGTAAACATCGATGGTGTGGTT	0.37037	27
Moraxella_bovoculi_CP011378.1_1	CCCATCAAGGCTTCAATATCATCGTGC	0.481481	27
Moraxella_bovoculi_CP011378.1_1	ATGAAATAGAGCAACAGCAGAACGGTA	0.407407	27
Moraxella_bovoculi_CP011378.1_1	TGCAGGTGGTGAATCAGCGACACATTC	0.518519	27
Moraxella_bovoculi_CP011378.1_1	CCTCCTCAATTAGCCTTGCAAAATGATAT	0.37931	29
Moraxella_bovoculi_CP011378.1_1	TCATGGCGTAGTTGCTACGCTGTAAT	0.461538	26
Moraxella_bovoculi_CP011378.1_1	TGGGAATATTATAGCAGATTTATTTAATT	0.206897	29
Moraxella_bovoculi_CP011378.1_1	AAGCGGTTCACAAAAACCACTCATTAAG	0.392857	28
Moraxella_bovoculi_CP011378.1_1	CTAAATGCCGTGTCGTTTTGGTTCTTAT	0.392857	28
Moraxella_bovoculi_CP011378.1_1	CTGTGGCTTTCATGTCACACCTCTCA	0.5	26
Moraxella_bovoculi_CP011378.1_1	GGAACCTGTTCGCCGCTTGGATGTTAC	0.555556	27
Moraxella_bovoculi_CP011378.1_1	GTCTTGGATAGTATGCAGTCGCATCAGCG	0.517241	29
Moraxella_bovoculi_CP011379.1_1	TTACTAAAAGCATACAGTCTGTTATAG	0.296296	27
Moraxella_bovoculi_CP011379.1_1	CCCATTCTAAGCTTGCGATTGCCATAAGT	0.448276	29
Moraxella_bovoculi_CP011379.1_1	AATGTTTTGGTAAATGTCCATTGTGCC	0.37037	27
Moraxella_bovoculi_CP011379.1_1	CAGACGGTGGTGCGTGATTTGTCAGCAC	0.571429	28
Moraxella_bovoculi_CP011379.1_1	TCATGGCGTAGTTGCTACGCTGTAAT	0.461538	26
Moraxella_bovoculi_CP011379.1_1	TGGGAATATTATAGCAGATTTATTTAATT	0.206897	29
Moraxella_bovoculi_CP011379.1_1	AAGCGGTTCACAAAAACCACTCATTAAG	0.392857	28
Moraxella_bovoculi_CP011379.1_1	CTAAATGCCGTGTCGTTTTGGTTCTTAT	0.392857	28
Moraxella_bovoculi_CP011379.1_1	CTGTGGCTTTCATGTCACACCTCTCA	0.5	26
Moraxella_bovoculi_CP011379.1_1	TAAAGAGTTTTACACTAACATTGAGGG	0.333333	27
Moraxella_bovoculi_CP011379.1_1	GGAACCTGTTCGCCGCTTGGATGTTAC	0.555556	27
Moraxella_bovoculi_CP011379.1_1	GTCTTGGATAGTATGCAGTCGCATCAGCG	0.517241	29
Moraxella_bovoculi_CP011380.2_1	ATTCGTGCGTATTTGATTTCTTTGTGT	0.333333	27
Moraxella_bovoculi_CP011380.2_1	CTCTCGCAAAAGTTCTTAGCAGCTTGCCA	0.482759	29
Moraxella_bovoculi_CP011380.2_1	CTTTCTGTTTTTCTTGATAATTTAAA	0.192308	26
Moraxella_bovoculi_CP011380.2_1	TTTAATAGACGCTTCAGCTTTATTGAT	0.296296	27
Moraxella_bovoculi_CP011380.2_1	GGATCATCTCCAGCGCTCGAAAAATTTA	0.428571	28
Moraxella_bovoculi_CP011380.2_1	TTTAACAACGCTTTTTCTGTAATTCATG	0.285714	28
Moraxella_bovoculi_CP011380.2_1	GCAGCCGCCTCGTTCGGGGTTTTTACTG	0.607143	28
Moraxella_bovoculi_CP011380.2_1	GCAAGCTGGGCTATGTTTGGGTAAGAG	0.518519	27
Moraxella_bovoculi_CP011380.2_1	TAGCTAATTTGTGATTATTTTGAATA	0.192308	26
Moraxella_bovoculi_CP011380.2_1	AAATCGACCCGATCGCATACATTGAGCG	0.5	28
Moraxella_bovoculi_CP011380.2_1	TCTGTCTTAGGGTCATAAGGTTTGCAG	0.444444	27
Moraxella_bovoculi_CP011380.2_1	TCGGCTGATTTTGGTGGTAATTGCCAC	0.481481	27
Moraxella_bovoculi_CP011380.2_1	CTTATGAACGATGATGGGCGATCTGCAA	0.464286	28
Moraxella_bovoculi_CP011380.2_1	CCGAGATTCTGCCTAGTGCCATATCT	0.5	26
Moraxella_bovoculi_CP011380.2_1	TCAACGGCAGTCAATAGCGACCAATCC	0.518519	27
Moraxella_bovoculi_CP011380.2_1	GGAAGTAGTTTTTGGACAGCTTCAAGCA	0.428571	28
Moraxella_bovoculi_CP011380.2_1	AAGGCTTTATGGTCTGATCAATCCAAG	0.407407	27
Moraxella_bovoculi_CP011380.2_1	GTTTGTATGTTTATTGTCTTTACTGTG	0.296296	27
Moraxella_bovoculi_CP011380.2_1	TTAACAACCACATCACGAGCTTATTAC	0.37037	27
Moraxella_bovoculi_CP011380.2_1	TTAAATACTAAAGCCAGTTTGCCTTGGC	0.392857	28
Moraxella_bovoculi_CP011380.2_1	ATTAGGGGGATAGGGTTTAATTCACCCA	0.428571	28
Moraxella_bovoculi_CP011380.2_1	ACGTAACAGTCGGTAAGGTACTTGCC	0.5	26
Moraxella_bovoculi_CP011380.2_1	AAGCTAATCTGCCAAAAGTTGCCTTTG	0.407407	27
Moraxella_bovoculi_CP011380.2_1	AGATGCAGTCTGATGAAAATAGCAAGCTTAG	0.387097	31
Moraxella_bovoculi_CP011380.2_1	CAAGTTCCAAGTGCCTGACTTAGGTAC	0.481481	27
Moraxella_bovoculi_CP011380.2_1	CGCGCGCGCCACTTGACATAATTACTCCTAA	0.516129	31
Moraxella_bovoculi_CP011380.2_1	AGCGATAGCGGTAATTGATTCAGAGCCA	0.464286	28
Moraxella_bovoculi_CP011380.2_1	TCAATAATTGACTGCCTAACCTTCGCAGA	0.413793	29
Moraxella_bovoculi_CP011380.2_1	GCCTTTTGTGTCTCACGCTCCGCCTTTTGC	0.566667	30
Moraxella_bovoculi_CP011380.2_1	AGCGGTATTACTCGCCTTTGAGCCAGAA	0.5	28
Moraxella_bovoculi_CP011380.2_1	GGTAGATGTATGTAGCCGTCTTTGATGT	0.428571	28
Moraxella_bovoculi_CP011380.2_1	GCGGTAGCGTTGATTGCGGTGGTCGCTGC	0.655172	29
Moraxella_bovoculi_CP011380.2_1	GACAATAAACCTTATCGCCCACTTTAA	0.37037	27
Moraxella_bovoculi_CP011380.2_1	ATCATCAATCATGCCTTGGTAACGTCTGA	0.413793	29
Moraxella_bovoculi_CP011380.2_1	ATGCGTATATGTCGCCAACGGTAGCGGT	0.535714	28
Moraxella_bovoculi_CP011380.2_1	TTCAAGGCTTCTTTTGCCATGCACGCCCTGC	0.548387	31
Moraxella_bovoculi_CP011380.2_1	ATTAGCCCCTTGTGGGCTTTTTTGTT	0.423077	26
Moraxella_bovoculi_CP011380.2_1	GGCAGCCGCCTCGTTCGGGGTTTTTGT	0.62963	27
Moraxella_bovoculi_CP011380.2_1	TAGGTGCTTGTGATGGTCGTATATTGTC	0.428571	28
Moraxella_bovoculi_CP011380.2_1	GACAGCTTCAAGCAGGGCATAACGGAC	0.555556	27
Moraxella_bovoculi_CP011380.2_1	CTGAAGATGGTAAGTGCCATCACAAAGAT	0.413793	29
Moraxella_bovoculi_CP011380.2_1	TTTGTGTAAGTTTCGCACTTCTTCTA	0.346154	26
Moraxella_bovoculi_CP011380.2_1	CAATCGCAAATTCATCACGCACGTGCAC	0.5	28
Moraxella_bovoculi_CP011380.2_1	TGAGACCCCAATCAGTAACAAAAAAT	0.346154	26
Moraxella_bovoculi_CP011381.2_1	CCGTTAACGTCTATATCCAAAAAGCCCA	0.428571	28
Moraxella_bovoculi_CP011381.2_1	GGTAACACAGGTTACTTTCTCGGATGGT	0.464286	28
Moraxella_bovoculi_CP011381.2_1	CGTGTGTAAGCTTGATTGCTGCCGACGT	0.535714	28
Moraxella_bovoculi_CP011381.2_1	AATGAGCATTGAAAGTTTTTGCGCCACTTC	0.4	30
Moraxella_bovoculi_CP011381.2_1	CCATTTTTAACTGTTATCAGACAAAA	0.269231	26
Moraxella_bovoculi_CP011381.2_1	TTATCGGTAAGTATGCTCTGCTCGTGT	0.444444	27
Moraxella_bovoculi_CP011381.2_1	CAGAAAAACGGAATTGCCAAGGATGG	0.461538	26
Moraxella_bovoculi_CP011381.2_1	TGATGTATGTTGGGGTTTTAAGCTCGCTC	0.448276	29
Moraxella_bovoculi_CP011381.2_1	GCATGAGCGATGGCATTTTCTTTGCTT	0.444444	27
Moraxella_bovoculi_CP011381.2_1	AATATTTATTTATCAGAATCGATGGTTC	0.25	28
Moraxella_bovoculi_CP011381.2_1	GTAAGCCACGCCGTTGTCACAAAATCA	0.481481	27
Moraxella_bovoculi_CP011381.2_1	ATGGCGATTGGGCGATACCAGCCAAGCG	0.607143	28
Moraxella_bovoculi_CP011381.2_1	ATTGTCATTTTTTGGTGTTGCTCTAGGC	0.392857	28
Moraxella_bovoculi_CP011381.2_1	ACGAAATAAGCGATGACGACGAGCTAA	0.444444	27
Moraxella_bovoculi_CP011381.2_1	AAACCTGTAAAATTTGTCCGATTTAGC	0.333333	27
Moraxella_bovoculi_CP011381.2_1	TGTAGTATGTCTGCTATTGGGTTGTAC	0.407407	27
Moraxella_bovoculi_CP011381.2_1	ATAGAGATTAAACCTACCCATGAAGAT	0.333333	27
Moraxella_bovoculi_CP011381.2_1	AAGGGCTTTTTATGTATTGGCTCTTAT	0.333333	27
Moraxella_bovoculi_CP011381.2_1	GAGATTAATGACATTACCGCCAAGA	0.4	25
Moraxella_bovoculi_CP011381.2_1	AGGATTGTATTTGCTTAGCTTCTTAACTA	0.310345	29
Moraxella_bovoculi_CP011381.2_1	TGAGACCCCAATCAGTAACAAAAAAT	0.346154	26
Moraxella_ovis_CP011158.1_1	AGGTGTGCAAATTCTCACATCAAATT	0.346154	26
Moraxella_ovis_CP011158.1_1	AATTTTAAGTTCTTGGCTTTTATTCTGGA	0.275862	29
Moraxella_ovis_CP011158.1_1	CTTGTGGACCTTGTGCGAAGCGTAGGGC	0.607143	28
Moraxella_ovis_CP011158.1_1	GTGTTATACGCTCTGTGACTCTCTGGTA	0.464286	28
Moraxella_ovis_CP011158.1_1	CGCCGCCTCGCATGCTACTCTATGCT	0.615385	26
Muribaculaceae_bacterium_CP045696	TTGACCAACTCACCGACGTGCCAGCCG	0.62963	27
Muribaculaceae_bacterium_CP045696	TATTCCTCGCGCTGTTTTTCCGCCACCATG	0.533333	30
Muribaculaceae_bacterium_CP045696	CCGCTGCGACACCGTGCACAGCAACAA	0.62963	27
Muribaculaceae_bacterium_CP045696	CACTTGTATGCGTAAATGCGTAAACGCTTG	0.433333	30
Muribaculaceae_bacterium_CP045696	CGACTTGTACAAGCCGCGTATCGTGTCG	0.571429	28
Muribaculaceae_bacterium_CP045696	GAAAGAGCGCGGCGGCTGTCTCTCTGATGA	0.6	30
Muribaculaceae_bacterium_CP045696	ATGCAATATTCGACGCCCTGTGGACTCG	0.535714	28
Muribaculaceae_bacterium_CP045696	GCGAACTTCCACAGGGAGTAATCAGCGA	0.535714	28
Muribaculaceae_bacterium_CP045696	AGAACGACTTCTTTCTGTCGCAGATAAGC	0.448276	29
Muribaculaceae_bacterium_CP045696	TCTGCGTCCCTCTTTTTTGCACAATTTTAT	0.366667	30
Muribaculaceae_bacterium_CP045696	GAGGGCTTGAGCTATGACTATGACAAAGC	0.482759	29
Muribaculaceae_bacterium_CP045696	TTTTCGGCAGAGGCCTTTAGCCTGTGCCG	0.586207	29
Muribaculaceae_bacterium_CP045696	TGAAGTGGTAGGGTCTGCCATAGTTTTTG	0.448276	29
Muribaculaceae_bacterium_CP045696	TGGCTGCTGAACGATAAAGATGCATAC	0.444444	27
Muribaculaceae_bacterium_CP045696	ATTTCTATGCGCCAAGCCCGTGAGGGT	0.555556	27
Parcubacteria_bacterium_LCIC01000001	GTCTGTGGGAGTTTTTCCATCAACAT	0.423077	26
Parcubacteria_bacterium_LCIC01000001	ATTACGTTCCAAATCCCTGCTCTCGC	0.5	26
Parcubacteria_bacterium_LCIC01000001	TGTTGTCTGCATCAGCGTGTGTGAG	0.52	25
Parcubacteria_bacterium_LCIC01000001	AATACTTCTGACGAACTGAACAAAAA	0.307692	26
Parcubacteria_bacterium_LCIC01000001	CGTTCTTTTCGGTGTTCGCATTCATCA	0.444444	27
Parcubacteria_bacterium_LCIC01000001	TCAGTTCTTGGTATTTCTTCATATTTTT	0.25	28
Parcubacteria_bacterium_LCIC01000001	AGTGTCTCTTTGAATTTATCTTCAATG	0.296296	27
Parcubacteria_bacterium_LCIC01000001	TTACATTCCCTGTCTGTGTTGCATTA	0.384615	26
Parcubacteria_bacterium_LCIC01000001	ATCATCTAGAGAGAACTTTTTATGAA	0.269231	26
Parcubacteria_bacterium_LCIC01000001	AGGTATCGTTAGGCGAATTAGCCGCG	0.538462	26
Parcubacteria_bacterium_LCIC01000001	TCATCGTTGAATATATTCTTGCTGATTA	0.285714	28
Parcubacteria_bacterium_LCIC01000001	ATGAATGGGTGAAGAGGAAAAATGATATT	0.310345	29
Parcubacteria_bacterium_LCIC01000001	TAGGAATGATAGCATACAGTACTATACAA	0.310345	29
Porphyromonas_crevioricanis_LS483447.1_1	ATCCTGAATATGAAACTAATAGAAATT	0.222222	27
Porphyromonas_crevioricanis_LS483447.1_1	TTGATGAGTTCTGCAAATTTCTCAAGAGA	0.344828	29
Porphyromonas_crevioricanis_LS483447.1_1	AGAGAGGCGTAAGTCTTAAATCCTGAAA	0.392857	28
Porphyromonas_crevioricanis_LS483447.1_1	TCGAAGACGTTGTAGCAGAATACGAAGACT	0.433333	30
Porphyromonas_crevioricanis_LS483447.1_1	ATAGAAACATCTGCAAAGCCAGATCGCTC	0.448276	29
Porphyromonas_crevioricanis_LS483447.1_1	GCTTACGTCCTTGCCACTATTCGCCTTGAA	0.5	30
Porphyromonas_crevioricanis_LS483447.1_1	TCCAAAGCCGATCGAGTCTTGCAGCCTGA	0.551724	29
Porphyromonas_crevioricanis_LS483447.1_1	AAATATGTCGTTTCAGGCGAATATGGGTC	0.413793	29
Porphyromonas_crevioricanis_LS483447.1_1	ATCGAACGTGGACTAACAAAGCCTGAATG	0.448276	29
Porphyromonas_crevioricanis_LS483447.1_1	AGAAAAGGTTCGTGCAAGGAGATTTGCA	0.428571	28
Porphyromonas_crevioricanis_LS483447.1_1	TCACTCTTACTTATGATGATGCTATGTTG	0.344828	29
Porphyromonas_crevioricanis_LS483447.1_1	GATATCAAGAACGACTATTTGAAGCTAAG	0.344828	29
Porphyromonas_crevioricanis_NZ_JQJC01000021	AAGACTTTATCGCGAAAACGGATGCGAC	0.464286	28
Porphyromonas_crevioricanis_NZ_JQJC01000021	ATTCCAGCATTCCATGTCGCATGTGCTA	0.464286	28
Porphyromonas_crevioricanis_NZ_JQJC01000021	TAAAATATTACGATGAAGAAGCTGGAGTC	0.344828	29
Porphyromonas_crevioricanis_NZ_JQJC01000021	AGCCTCAGTCAATTTTGATTGAAGGATA	0.357143	28
Porphyromonas_crevioricanis_NZ_JQJC01000021	AAGTTGTCTACATCTATCTGTTCAGAAG	0.357143	28
Porphyromonas_crevioricanis_NZ_JQJC01000021	AGCAACGCACCGGCTTGCTCCATGCGGAA	0.62069	29
Porphyromonas_crevioricanis_NZ_JQJC01000021	GACATGCATCGCTCCCCCGTTTTGGTT	0.555556	27
Porphyromonas_crevioricanis_NZ_JQJC01000021	AGAAGCAGGCCATAGTCTCGCTCTTTTCCG	0.533333	30
Porphyromonas_crevioricanis_NZ_JQJC01000021	AAGAGCCATTTGGCGATGATGTGAGTGAA	0.448276	29
Porphyromonas_crevioricanis_NZ_JQJC01000021	TCACTCTTACTTATGATGATGCTATGTTG	0.344828	29
Porphyromonas_crevioricanis_NZ_JQJC01000021	GATATCAAGAACGACTATTTGAAGCTAAG	0.344828	29
Porphyromonas_crevioricanis_NZ_JQJC01000021	GGTTCGCATGTGTGGGTGTGGCTTAACGC	0.586207	29
Porphyromonas_macacae_NZ_BAKQ01000001	CCCGAACTGATTTTTACTGCTGGGCGACTA	0.5	30
Porphyromonas_macacae_NZ_BAKQ01000001	TATAACTTGTTTTCTTATCATTCAAGG	0.259259	27
Porphyromonas_macacae_NZ_BAKQ01000001	AGCAAGAATCAACTGATTGAGGTTTCACGT	0.4	30
Porphyromonas_macacae_NZ_BAKQ01000001	ATTGTTCGGAAACAGACAGGCAGCTTATT	0.413793	29
Porphyromonas_macacae_NZ_BAKQ01000001	TGATGCAGAATGATCAGACAAGACCTCCC	0.482759	29
Porphyromonas_macacae_NZ_BAKQ01000001	AAAGGGACGAATTGTATTTTAACATGAGCC	0.366667	30
Porphyromonas_macacae_NZ_BAKQ01000001	AAACAAAGCGGTGCTGTTGTCTTGTTTTG	0.413793	29
Porphyromonas_macacae_NZ_BAKQ01000001	CTGCGAATGACTGGGAAGAGCGTGTACGC	0.586207	29
Porphyromonas_macacae_NZ_BAKQ01000001	GTTCGGTGTATGCCGGATGTGGATGGTGA	0.551724	29
Porphyromonas_macacae_NZ_BAKQ01000001	AAAAACGGCTTGTTTAGCTAAATGAAAA	0.285714	28
Porphyromonas_macacae_NZ_BAKQ01000001	AAATATTTTCTTGCGGTAAGTGATAGCA	0.321429	28
Porphyromonas_macacae_NZ_BAKQ01000001	TATGATGGAAGCAGCTTTGATTATTAAG	0.321429	28
Porphyromonas_macacae_NZ_BAKQ01000001	TGAAGAAGCTTGTATTAATTGATAAGGA	0.285714	28
Porphyromonas_macacae_NZ_BAKQ01000001	AAAAACGGCTTGTTTAGCTAAATGAAA	0.296296	27
Prevotella_disiens_NZ_AEDO000031	ACTTTGCAAATGTTCTTTAATCCATC	0.307692	26
Prevotella_disiens_NZ_AEDO000031	AACGCGTTATATGGTGGTATTGAATATATAC	0.322581	31
Prevotella_disiens_NZ_AEDO000031	CCAAGTGAAGGAAAGAAGTCGAGCAACC	0.5	28
Prevotella_disiens_NZ_AEDO000031	ACGATAGGCTGGCGTAGAAGTGCTTTCAAC	0.5	30
Prevotella_disiens_NZ_AEDO000031	CTTATTCATCCTCTCGATATACTCTTCA	0.357143	28
Prevotella_disiens_NZ_AEDO000031	TCAATAGCGTAGTAGATAGACTTCATA	0.333333	27
Prevotella_disiens_NZ_AEDO000031	AACAATCGCTTTTCGCCCATTGGGTAGC	0.5	28
Prevotella_disiens_NZ_AEDO000031	TTTACTTTCGTTCCATCCAACTTTCTAA	0.321429	28
Prevotella_disiens_NZ_AEDO000031	TTTTATCTCTATCTAAATGCAGATTAAATT	0.2	30
Prevotella_disiens_NZ_AEDO000031	ATACGAGCCAACTATTTGCTAAAAAGAGT	0.344828	29
Prevotella_disiens_NZ_AEDO000031	TAAGGTGAACAACACTACACCCGCCAC	0.518519	27
Prevotella_disiens_NZ_AEDO000031	AAGTCGCAACAGCGCAATCAGACAACGGAC	0.533333	30
Prevotella_disiens_NZ_AEDO000031	TTTAAGGCTCTTTTTGGAGAAGCCTAAC	0.392857	28
Prevotella_disiens_NZ_AEDO000031	TTGTGCCGTTGTATTTGTCTTTGAGTTC	0.392857	28
Pseudobutyvibrio_xylanivorans_CP043028	ACCGCGCAATGAATGATTGCAAAAA	0.4	25
Pseudobutyvibrio_xylanivorans_CP043028	ACATCTACCCAGACGGTAACAGAACA	0.461538	26
Pseudobutyvibrio_xylanivorans_CP043028	ACAGGCTCGCCTTTGCTGTTCTTCCAG	0.555556	27
Pseudobutyvibrio_xylanivorans_CP043028	GATTGAAATACTCCAATTCGCTATCC	0.384615	26
Pseudobutyvibrio_xylanivorans_CP043028	CCTGTGTATTTTGCTATTTATAACGAT	0.296296	27
Pseudobutyvibrio_xylanivorans_CP043028	GTTGCCCTCAGCTCTGCTTGGTATTC	0.538462	26
Pseudobutyvibrio_xylanivorans_CP043028	ATTGACGATATCGGTGGATTTTTGCGCG	0.464286	28
Pseudobutyvibrio_xylanivorans_CP043028	TTGTGCAGGTTCCAAGGGCACAGCCTTT	0.535714	28
Ruminococcus_species_CP039381	TGCTAGGTGTAGCCGTAACGATTGTG	0.5	26
Ruminococcus_species_CP039381	CTCCCATTTTGTCTAGGTATTCAAAGACT	0.37931	29
Ruminococcus_species_CP039381	AGAAAGCAATAGACGACTATATCGACC	0.407407	27
Ruminococcus_species_CP039381	TCGCAATAAATATGAAGAAGTTCGGGAG	0.392857	28
Ruminococcus_species_CP039381	AAATGCAGGTATTTCACCTATATTAGC	0.333333	27
Ruminococcus_species_CP039381	ATGGTAACTATCTTTACAATGGCATTA	0.296296	27
Ruminococcus_species_CP039381	CGGAACAACATAATCATTGTTGATTGT	0.333333	27
Sedimentisphaera_cyanobacteriorum_CP019633	CCGTATTTGCCGATTTTGTAATCAAC	0.384615	26
Sedimentisphaera_cyanobacteriorum_CP019633	ATAAACCTACTGCCGAATACAAAGATT	0.333333	27
Sedimentisphaera_cyanobacteriorum_CP019633	CCCTTGCCCTCGTCGCTCGGTGCGGCGTCTAA	0.6875	32
Sedimentisphaera_cyanobacteriorum_CP019633	TCCAAAAAACGAAGAAGAAATTCAAGC	0.333333	27
Sedimentisphaera_cyanobacteriorum_CP019633	TCGCCAAACAGATGTTTACGACCGCTGTC	0.517241	29
Sedimentisphaera_cyanobacteriorum_CP019633	TTTCTTGCCTTTCTGTTATGGGATGTG	0.407407	27
Sedimentisphaera_cyanobacteriorum_CP019633	GTTACAGGGTCAACGACTATCACCTT	0.461538	26
Sedimentisphaera_cyanobacteriorum_CP019633	ATACGCTAAAGAAGTTCACGGGGTAC	0.461538	26
Sedimentisphaera_cyanobacteriorum_CP019633	AAAGGTGATTAAGGTTTTCTCACGAAAGT	0.344828	29
Sedimentisphaera_cyanobacteriorum_CP019633	ACACCGCTCCAGAATATCAAGTGTTTATT	0.37931	29
Sedimentisphaera_cyanobacteriorum_CP019633	ATAAAAAATCAGGAGTATATAATTCTC	0.222222	27
Sedimentisphaera_cyanobacteriorum_CP019633	TTGGCCTGAATTGGCTCATTTAGGTGAA	0.428571	28
Sedimentisphaera_cyanobacteriorum_CP019633	TGGGCGCACGAGATAACCCTGATGAT	0.538462	26
Smithsella_species_NZ_JQDQ01000121	GTCATAGACCAGTCACATTTTCCATTAT	0.357143	28
Smithsella_species_NZ_JQDQ01000121	TTATAAACTTCATCTTCGGCTTTTGAAAT	0.275862	29
Smithsella_species_NZ_JQDQ01000121	GCAAGGTTCACTTGTATTTTCATACATGG	0.37931	29
Smithsella_species_NZ_JQDQ01000121	CGGTTAATTGACACTCCGCTACCCTGAC	0.535714	28
Smithsella_species_NZ_JQDQ01000121	TTATAGGCGATTCCGCTTTTGAAACTA	0.37037	27
Smithsella_species_NZ_JQDQ01000121	AATACCGGCTGAAGGGAAAAGGTAAAATA	0.37931	29
Smithsella_species_NZ_JQDQ01000121	ACTATCCAACAAAGGCCAGTATGTCTCA	0.428571	28
Smithsella_species_NZ_JQDQ01000121	CTCAAGTTCAGCAACTAGGCCTTGCAAC	0.5	28
Smithsella_species_NZ_JQDQ01000121	TTTTGGTATTGCAGAACAATCCAAGTT	0.333333	27
Smithsella_species_NZ_JQDQ01000121	ATCCTCCTCTTCTGGTTGCATATCAAAA	0.392857	28
Smithsella_species_NZ_JQDQ01000121	TTTCTGTGTCTGAGATTGACGTTGTCCA	0.428571	28
Smithsella_species_NZ_JQDQ01000121	TTTGATTTAACTTCTAATATCTGATTGAG	0.241379	29
Smithsella_species_NZ_JQDQ01000121	ACAAAATGGATTTCCCTTTTTAAAGGA	0.296296	27
Smithsella_species_NZ_JQDQ01000121	TGACATAGCCCCCTGTTGTACCTGCT	0.538462	26
Smithsella_species_NZ_JQDQ01000121	TCCGGCAACTGCTTTGATATTTCGAGT	0.444444	27
Smithsella_species_NZ_JQDQ01000121	CGGAGGCTATTGTGAAAAGGAGGGA	0.52	25
Smithsella_species_NZ_JQDQ01000121	TTATAGTAATCATCTCTGTATATCAG	0.269231	26
Smithsella_species_NZ_JQDQ01000121	ACGACGGCTCGATTTTTGACGAATATGAG	0.448276	29
Smithsella_species_NZ_JQDQ01000121	AGATTTTCATAATGATTTAACCATACTAG	0.241379	29
Smithsella_species_NZ_JQDQ01000121	ATAAAATTGTTTTCTAGTTAGTTTATC	0.185185	27
Smithsella_species_NZ_JQDQ01000121	AACAACTTTTTTTATATTAGTTTATCTGT	0.172414	29
Smithsella_species_NZ_JQDQ01000121	ACAGGAAGCGCAAATGTTCCTTGTCTTC	0.464286	28
Smithsella_species_NZ_JQDQ01000121	ATAGAAGGATTGTCTCAACACAAAGAAA	0.321429	28
Smithsella_species_NZ_JQDQ01000121	GGTCATTTATCTCTTTTCTTGTAATCAT	0.285714	28
Smithsella_species_NZ_JQDQ01000121	TAATCGATCAGGTATTGTTCAATCGT	0.346154	26
Smithsella_species_NZ_JQDQ01000121	GGGCTAAGGGACACAAGGCATTCTCTTA	0.5	28
Smithsella_species_NZ_JQDQ01000121	TCCAGCATAAGCCTGACATAAGTATAGT	0.392857	28
Smithsella_species_NZ_JQDQ01000121	TGATAACGGAGGCTATGTCCGGCCAGAC	0.571429	28
Smithsella_species_NZ_JQDQ01000121	ACTGCAGCTGCACCGCTTGTAATTGTCT	0.5	28
Smithsella_species_NZ_JQDQ01000121	TCCAGCCAGATTGCAGCTGTTACATTTCCACT	0.46875	32
Smithsella_species_NZ_JQDQ01000121	CAAACGCTTCGTTCATGTCGTTAATTTC	0.392857	28
Smithsella_species_NZ_JQDQ01000121	GCTAAAGCTTCGGCCATTGCATTATCGAG	0.482759	29
Smithsella_species_NZ_JQDQ01000121	TTTTATATATTGTTGGGCATATTTATTA	0.178571	28
Smithsella_species_NZ_JQDQ01000121	ACAAGTAAATTGCTATACTGATGGAGAATAT	0.290323	31
Smithsella_species_NZ_JQDQ01000121	ATTGGCACATCACATCAGATATTATTGATGAC	0.34375	32
Smithsella_species_NZ_JQDQ01000121	TTTTCCCGCAAGTGCATCAAACATATC	0.407407	27
Smithsella_species_NZ_JQDQ01000121	ATTAGATCGTTGAATTGTTAAACGAATT	0.25	28
Smithsella_species_NZ_JQDQ01000121	TCTTACCAATGTGATATTGGGTAACGAA	0.357143	28
Sneathia_amnii_CP011280	CAAGGGTGGTACAACAGATTAAATAA	0.346154	26
Sneathia_amnii_CP011280	CCTTTAATTCTTTTACAAAAGTTAAT	0.192308	26
Sneathia_amnii_CP011280	AGTTGTTTTCACATGTTGGTATATA	0.28	25
Sneathia_amnii_CP011280	CGATATAATCTACATAGTTTGGATAA	0.269231	26
Sneathia_amnii_CP011280	AAGAAATGTTGCTTGCTCACATTCA	0.36	25
Sneathia_amnii_CP011280	TATATCCGTTGTGTTATTGTCTGGT	0.36	25
Sneathia_amnii_CP011280	GAAGAAGAATTAATCGTGCGTTAATC	0.346154	26
Sneathia_amnii_CP011280	TAGAACATATTAATCGTAGTTGCACA	0.307692	26
Sneathia_amnii_CP011280	TGGAATAAATAATGCAACAATTGTAA	0.230769	26
Sneathia_amnii_CP011280	TAGTATCATATCTTTATACTTACCAT	0.230769	26
Sneathia_amnii_CP011280	GGGAAACTAATGCTAGCAATGGTGA	0.44	25
Sneathia_amnii_CP011280	ATATGTATTTTGAATATTAGGTATCT	0.192308	26

## Sheet: Cas12aSeparators(Fig.2)
Species	Separator(NotUnique)	Gccontent	SeparatorLength
Acidaminococcus_species_NZ_AWUR01000016	GTCAAAAGACCTTTTT	0.3125	16
Acidaminococcus_species_NZ_AWUR01000016	GTCAAAAGGCCTTTTT	0.375	16
Butyrivibrio_proteoclasticus_CP001812	GTTTTAGAACCTTAAAAT	0.222222	18
Butyrivibrio_proteoclasticus_CP001812	GTTTTAGAACCTTAAAA	0.235294	17
Butyrivibrio_proteoclasticus_CP001812	GTTTTATAACCTTAAAAA	0.166667	18
Butyrivibrio_proteoclasticus_CP001812	GTCTTAGAACCTTAAAA	0.294118	17
Butyrivibrio_proteoclasticus_CP001812	GTTTTAGAACCTTTAAAAT	0.210526	19
Butyrovibrio_hungatei_CP017832	GTCTAAGACTTAAAGAT	0.294118	17
Butyrovibrio_hungatei_CP017832	GTCTAAGACTTAAAGTT	0.294118	17
Butyrovibrio_hungatei_CP017832	GTCTAAGACTTAAAGAAA	0.277778	18
Candidatus_Peregrinibacteria_bacterium_LBOO01000015	GTTTAAAAGTCCTATTG	0.294118	17
Catenovulum_sp_CP026604	GTCTAAGCCTTAGCTTA	0.411765	17
Eubacterium_eligens_CP001104	GTTTGAATAACCTTAAAT	0.222222	18
Eubacterium_eligens_CP001104	GTTTGAATAGCCTTAAAT	0.277778	18
Eubacterium_eligens_NC_012778	GTTTGAATAACCTTAAAT	0.222222	18
Eubacterium_eligens_NC_012778	GTTTGAATAGCCTTAAAT	0.277778	18
Eubacterium_eligens_NC_012778	GTTTGAATAATCTTAAAT	0.166667	18
Eubacterium_rectale_FP929043	GTTGAGACTGTAAGCGA	0.470588	17
Eubacterium_rectale_FP929043	GTTGAAACTGTAAGCGG	0.470588	17
Eubacterium_rectale_FP929043	GTCGAAACTGTAAGCGA	0.470588	17
Eubacterium_rectale_FP929043	GTTAAAACTGTAAACGG	0.352941	17
Eubacterium_rectale_FP929043	GTTGAAACCGTAAGCGG	0.529412	17
Eubacterium_rectale_FP929043	GTTGAAACTGTAAAGAA	0.294118	17
Eubacterium_rectale_FP929043	GTTGAAACTGTAAGAAA	0.294118	17
Eubacterium_rectale_FP929043	GTTGAAACTGTGAGAAA	0.352941	17
Eubacterium_rectale_FP929043	GTTAAGACTGCAAGGA	0.4375	16
Eubacterium_rectale_FP929043	GTTAAAACTGTAAGCGG	0.411765	17
Eubacterium_rectale_FP929043	ATTGAAACTGTAAAGA	0.25	16
Eubacterium_rectale_FP929043	GTCTGAAACTGTAAACGG	0.444444	18
Eubacterium_rectale_FP929043	GTTGAAGCTGTAAGCAA	0.411765	17
Eubacterium_rectale_FP929043	GTTGAATCTGTACGGA	0.4375	16
Eubacterium_rectale_FP929043	GCTGAGATTGTAAAGTGA	0.388889	18
Eubacterium_rectale_FP929043	GTTGGGACTGTGAGCCA	0.588235	17
Eubacterium_rectale_FP929043	GTTGATACTGTGAGCGG	0.529412	17
Eubacterium_rectale_FP929043	GTTGAAACTGTTAGGGG	0.470588	17
Eubacterium_rectale_FP929043	GTAGACGATGAAGCGA	0.5	16
Eubacterium_rectale_FP929043	ATTGAGGCCGTAAGCAA	0.470588	17
Flavobacterium_branchiophilum_FQ859183	GTTTAAAACCACTTTAA	0.235294	17
Francisella_hispaniensis_CP018093	GTCTAAGAACTTTAAAT	0.235294	17
Francisella_novicida_CP000439	GTCTAAGAACTTTAAAT	0.235294	17
Francisella_novicida_CP002557	GTCTAAGAACTTTAAAT	0.235294	17
Francisella_novicida_CP009353	GTCTAAGAACTTTAAAT	0.235294	17
Francisella_novicida_CP009633	GTCTAAGAACTTTAAAT	0.235294	17
Francisella_novicida_CP009653	GTCTAAGAACTTTAAAT	0.235294	17
Francisella_novicida_CP016635	GTCTAAGAACTTTAAAT	0.235294	17
Francisella_novicida_CP021490	GTCTAAGAACTTTAAAT	0.235294	17
Francisella_tularensis_novicida_NC008601	GTCTAAGAACTTTAAAT	0.235294	17
Lachnospiraceae_bacterium_NZ_JNKS01000011	GTTTCAAAGATTAAAT	0.1875	16
Lachnospiraceae_bacterium_NZ_JNKS01000011	GTTTCAAAGATTGAAG	0.3125	16
Lachnospiraceae_bacterium_NZ_JNKS01000011	TTTTAAAAGATTGAAA	0.125	16
Lachnospiraceae_bacterium_AP018536	GTTAAATAATAAGAAAG	0.176471	17
Lachnospiraceae_bacterium_AP018536	GTTAAATAATAAGAAAA	0.117647	17
Lachnospiraceae_bacterium_AP018536	ATAAAATAATAAGAAAG	0.117647	17
Lachnospiraceae_bacterium_NZ_JQKK01000008	AGCTTAGAACATTTAAAA	0.222222	18
Lachnospiraceae_bacterium_NZ_JQKK01000008	TGCTTAGAACATTTAAAG	0.277778	18
Lachnospiraceae_bacterium_NZKL370807	CTCTAATAAGAGATATG	0.294118	17
Lachnospiraceae_bacterium_NZKL370807	CTCTAATAGGAGATATG	0.352941	17
Lachnospiraceae_bacterium_NZKL370807	CGCTAATAGGAGATATG	0.411765	17
Leptospira_inadai_NZ_AHMM02000017	CTCTAAAGAGAGGAAAG	0.411765	17
Moraxella_bovis_CP030241	GTCTAACGACCTTTTA	0.375	16
Moraxella_bovoculi_AOMT01000011	GTCTAACGACCTTTTA	0.375	16
Moraxella_bovoculi_AOMT01000011	CTCAAAACTCATTCG	0.4	15
Moraxella_bovoculi_CP011374	GTCTAACGACCTTTTA	0.375	16
Moraxella_bovoculi_CP011374	GTCTAACGACCTTCTA	0.4375	16
Moraxella_bovoculi_CP011376	GTCTAACGACCTTTTA	0.375	16
Moraxella_bovoculi_CP011378	GTCTAACGACCTTTTA	0.375	16
Moraxella_bovoculi_CP011379	GTCTAACGACCTTTTA	0.375	16
Moraxella_bovoculi_CP011380	GTCTAACGACCTTTTA	0.375	16
Moraxella_bovoculi_CP011381	GTCTAACGACCTTTTA	0.375	16
Moraxella_bovovuli_CP011377	GTCTAACGACCTTTTA	0.375	16
Moraxella_ovis_CP011158	GTCTAACGACCTTTTA	0.375	16
Muribaculaceae_bacterium_CP045696	GGCTACATAAAGCCTAT	0.411765	17
Muribaculaceae_bacterium_CP045696	GGCTACATAAAGCCTGT	0.470588	17
Muribaculaceae_bacterium_CP045696	TGCTACATAAAGCCTGT	0.411765	17
Muribaculaceae_bacterium_CP045696	GGCTACTTAAAGCCTAT	0.411765	17
Parcubacteria_bacterium_LCIC01000001	GCCAAATACCTCTATAA	0.352941	17
Porphyromonas_crevioricanis_LS483447	GTCTAGGTACTCTCTTT	0.411765	17
Porphyromonas_crevioricanis_NZ_JQJC01000021	GTCTAGGTACTCTCTTT	0.411765	17
Porphyromonas_macacae_NZ_BAKQ01000001	GCCTATAAGGCTTTAGT	0.411765	17
Porphyromonas_macacae_NZ_BAKQ01000001	AGCTATAAGGCTTTAGT	0.352941	17
Porphyromonas_macacae_NZ_BAKQ01000001	TGCTATAAGGCTTTAGT	0.352941	17
Porphyromonas_macacae_NZ_BAKQ01000001	GCCTATAAGGCTTCAGT	0.470588	17
Prevotella_disiens_NZ_AEDO000031	GTCAATAAGACTCATTT	0.294118	17
Prevotella_disiens_NZ_AEDO000031	ATCAATAAGACTCATTT	0.235294	17
Pseudobutyvibrio_xylanivorans_CP043028	GCTTAGAACCTTTAAAT	0.294118	17
Ruminococcus_species_CP039381	GCTTAATCAACCCTTAG	0.411765	17
Ruminococcus_species_CP039381	GTTTAATCAACCCTTAG	0.352941	17
Ruminococcus_species_CP039381	GTTTAATAATCCTTTAG	0.235294	17
Sedimentisphaera_cyanobacteriorum_CP019633	GTCTAAAGGCCTTATAA	0.352941	17
Smithsella_species_NZ_JQDQ01000121	GTCCAAAGGACGGATTA	0.470588	17
Sneathia_amnii_CP011280	GATTTGAAAGCATCTTTT	0.277778	18
Sneathia_amnii_CP011280	TATTTGAAAGCATCTTTT	0.222222	18
Sneathia_amnii_CP011280	AATTTGAAAGCATCTTTT	0.222222	18
Sneathia_amnii_CP011280	AGTTTGAAAGCATATTTT	0.222222	18
Sneathia_amnii_CP011280	GATTTGAAAGCATATTTT	0.222222	18
Sneathia_amnii_CP011280	TATTTGGAAGCACATTTT	0.277778	18
Sneathia_amnii_CP011280	CATTTGGAAGCATATTTT	0.277778	18
Sneathia_amnii_CP011280	AATTTGGAAGCACATTTT	0.277778	18
Sneathia_amnii_CP011280	TGTTTGGAAGCATATTTT	0.277778	18

## Sheet: Cas13dRepeats(Fig.S3)
Species	Repeat(SeparatorUnderscored)
Anaerobic_digester_megagenome_15706_KonermannEtAl	GACCAACACCTCTGCAAAACTGCAGGGGTCTAAAAC
Eubacterium_siraeum_KonermannEtAl	GAACTACACCCGTGCAAAAATGCAGGGGTCTAAAAC
Eubacterium_siraeum_FP929044	GTTTTACTACCCTATAAATTTACACTACTCTCAAAC
Eubacterium_siraeum_FP929044	GTTTTACTGCCCTATAAATTTACACTACTCTCAAAC
Eubacterium_siraeum_FP929044	GTTTTACTACCCTATAAATTTACACTACTTTCAAAC
Filifactor_alocis_CP002390	GTTTGACTACCATATGAAATTACACTACTCTCAAAC
Lachnoclostridium_focaeense_LT635479	GTTTGAGAGTAGTGTAAATCTATAGGGTAATGAAAC
Lachnoclostridium_focaeense_LT635479	GTTTGAGAGTAGTGCAAATTATGGGGTAATTAAAT
Mordavella_sp_LT990039	GTTTAACTACCATACAAATTTACACTACTCTCAAAC
Mordavella_sp_LT990039	GTTTAACTAGCATACAAATTTACACTACTCTCAAAC
P1E0-k21_Gut_metagenome_assembly_KonermannEtAl	GCACTACACCCCCCTGAAACATGAGGGGTCTAAAAC
Ruminococcus_albus_KonermannEtAl	CTACTATACTAGTGTGATTTTACACTAGTCTAAAAC
Ruminococcus_flavefaciens_KonermannEtAl	GAACTATAGTAGTGTGAATTTACACTACTCTAAAAC
Ruminococcus_flavefaciens_XPD3002__KonermannEtAl	CAAGTAAACCCCTACCAACTGGTCGGGGTTTGAAAC
Ruminococcus_sp_CP039381	GTTTGAGAGTAGTGTAATTTCATGAAAAGAATAATT
Ruminococcus_sp_CP039381	GTTTGAGAGTAGTGTAATTTCATAAGGTATAAAAAC
Uncultured_Ruminococcus_sp_KonermannEtAl	CTACTACACTGGTGCAAATTTGCACTAGTCTAAAAC

## Sheet: denAsCas12aRepeat(Fig.3J)
denAsCas12a Repeat
AATTTCTACTCTTGTAGAT
