# Supplementary material for: Enhanced Cas12a multi-gene regulation using a CRISPR array separator
Source: eLife. 2021 Sep 9;10:e66406. doi: 10.7554/eLife.66406 (PMC8478413; doi:10.7554/eLife.66406)
Supplement: Supplementary file 3. [file elife-66406-supp3.xlsx]

## Sheet: EndogenousGeneActivFig.5
TargetGene	Spacer	RTqPCRprimer_F	RTqPCRprimer_R
CD9	AAAAGTGCCACTCCTTAGGG	CACCAAGTGCATCAAATACCTG	GTTTCTTGCTCGAAGATGCTC
IFNG	AGATGAGATGGTGACAGATA	TCGGTAACTGACTTGAATGTCCA	TCGCTTCCCTGTTTTAGCTGC
EGFR	CTCCAGAGCCCGACTCGCCG	TTGCCGCAAAGTGTGTAACG	GTCACCCCTAAATGCCACCG
TMEM107	TCGGCTTGCGGGGAGACTTC	GAGTCTCCATGTTCAACAGCA	TCCCAACGCTCGAATATGAAG
IMPACT	CACCCTTCGGCCCGCCACCC	TACAGCTCCACCTATCTACCA	ACATCTCTTATTTTCTCCACCCA
DANCR	AGAAAGGGAATCCCAGGGCC	AGGAGTTCGTCTCTTACGTCT	TGAAATACCAGCAACAGGACA
GFP(TRE3G_promoter)	CTCCCTATCAGTGATAGAGA	ACTTCAAGAGCGCCATCCA	GTCTTGAAGGCGTGCTGGTA
RPL13A(ControlGene)	NA	CCTGGAGGAGAAGAGGAAAGAGA	TTGAGGACCTCTGTGTATTTGTCAA

## Sheet: Repeats
LbCas12aRepeat_NoSeparator	LbCas12aRepeat_AAAT_separator
AATTTCTACTAAGTGTAGAT	AAATAATTTCTACTAAGTGTAGAT
