# Supplementary figures and images for: Enhanced Cas12a multi-gene regulation using a CRISPR array separator
Source: eLife journal article supplement (doi:10.7554/elife.66406), 2021-09-09

Figure 4-figure supplement 1

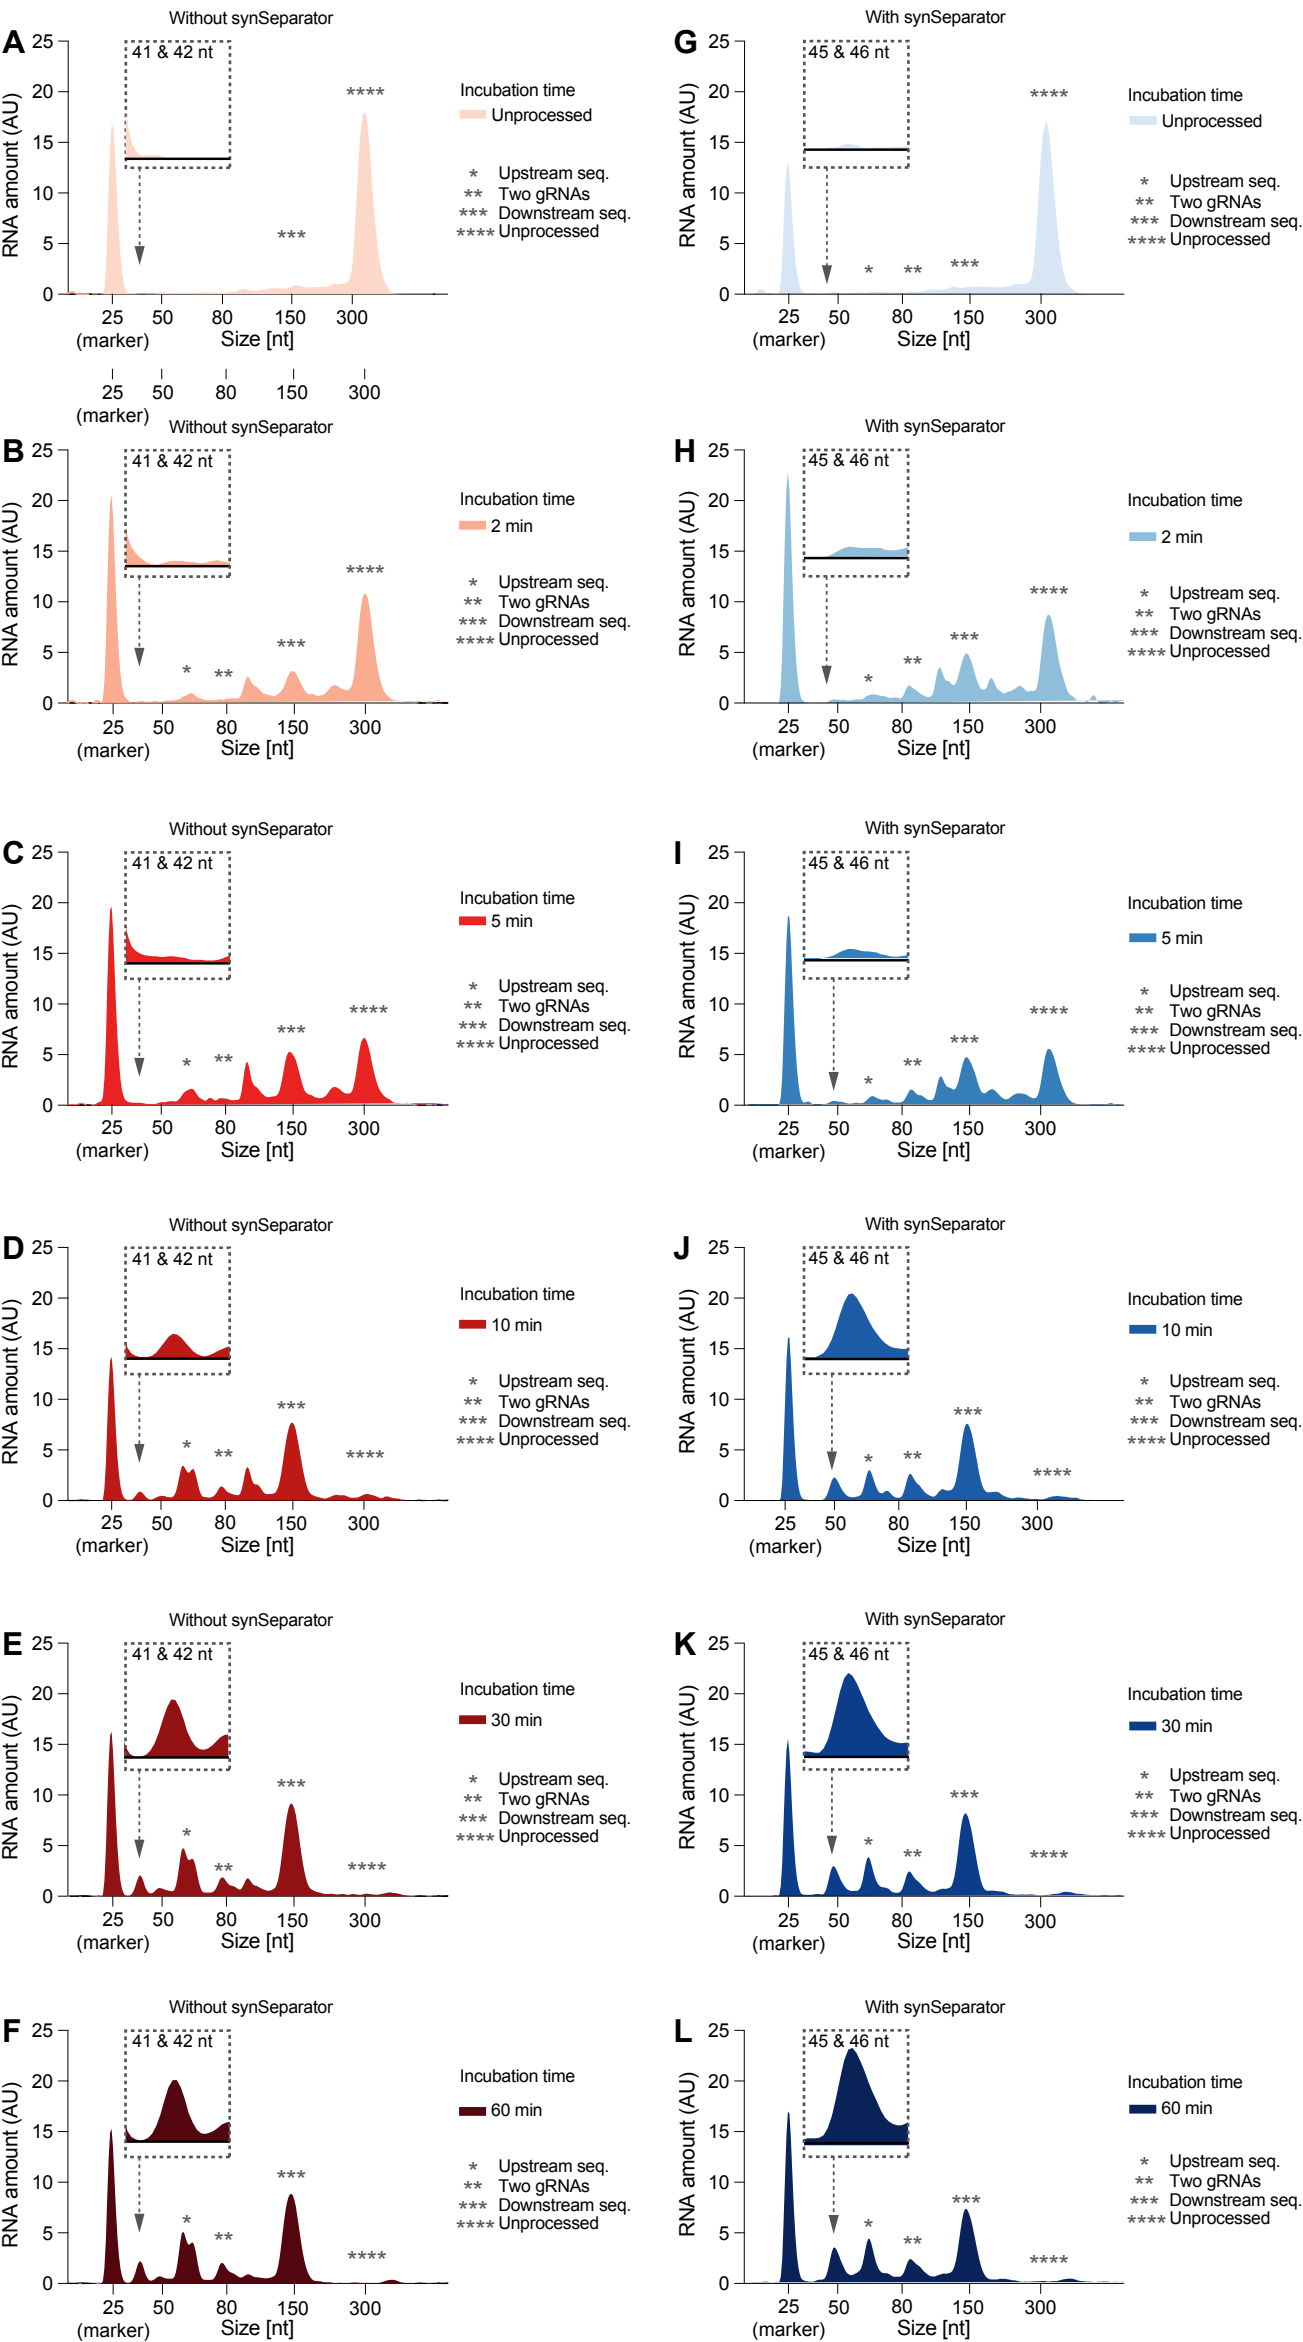

Supplement: supp [file elife-66406-supp-v1.zip]

**Figure 3-figure supplement 1**

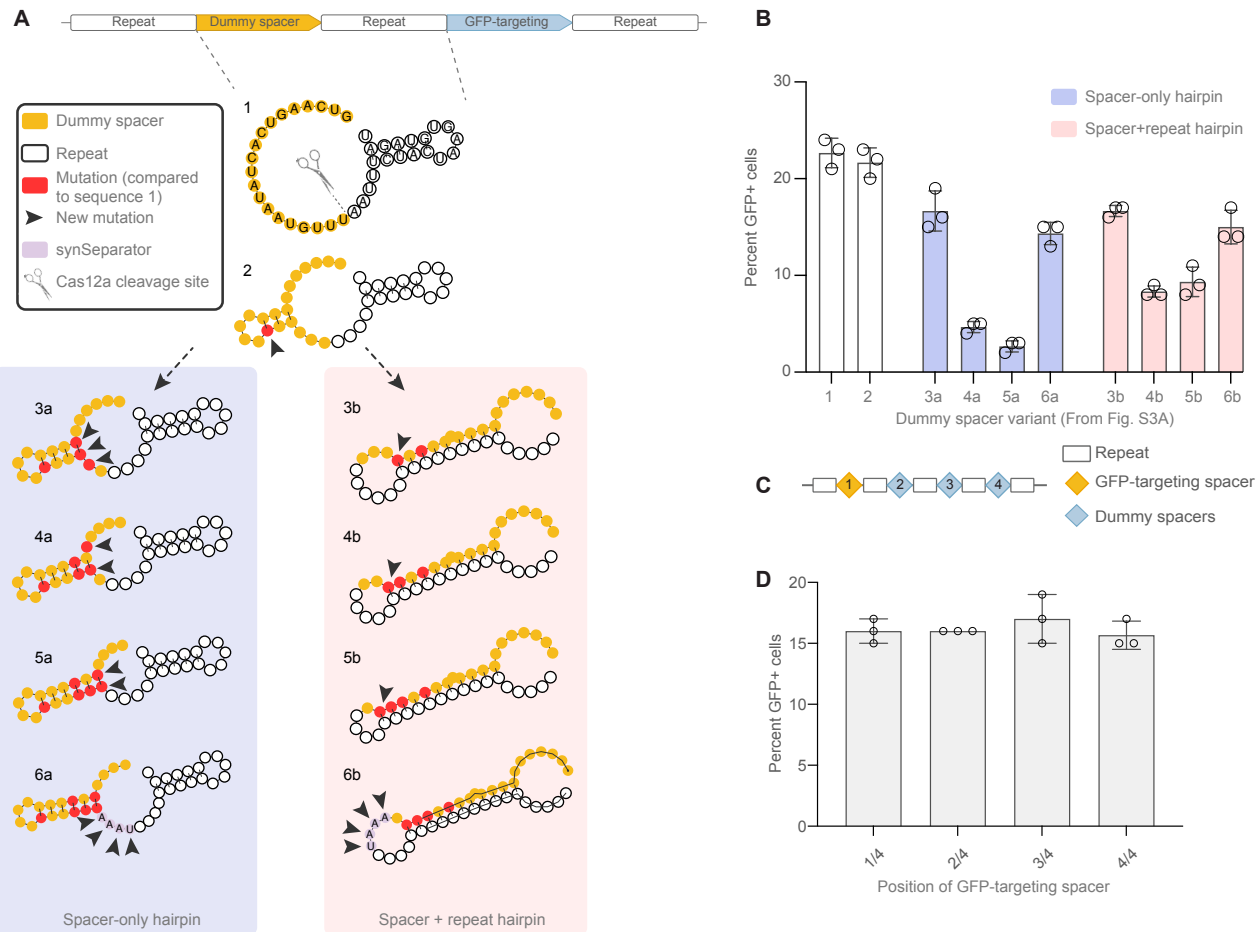

Supplement: supp [file elife-66406-supp-v1.zip]

**Figure 1-figure supplement 1**

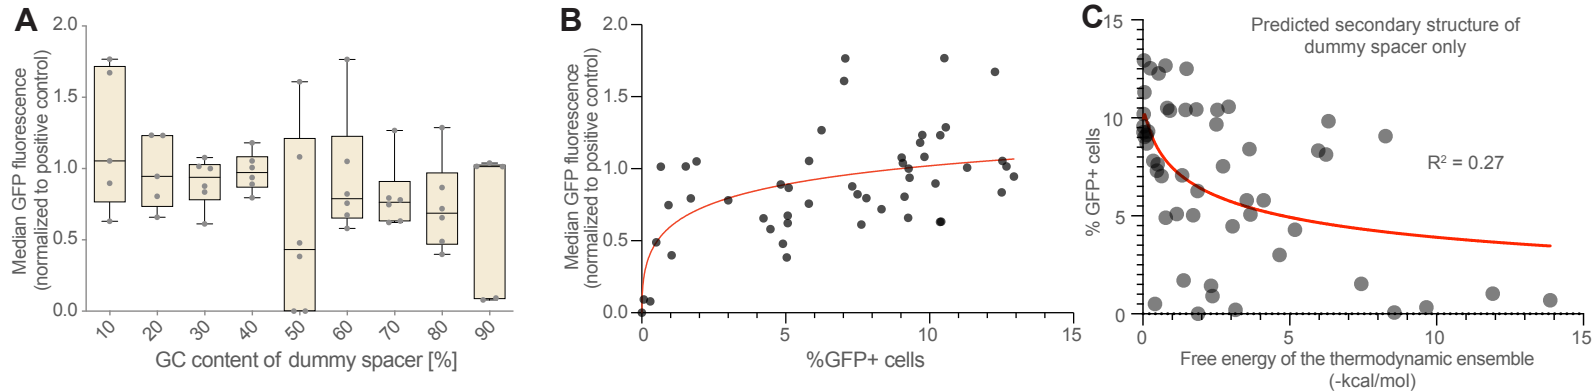

Supplement: supp [file elife-66406-supp-v1.zip]
